# Supplementary material for: Pcyt2 deficiency causes age-dependant development of nonalcoholic steatohepatitis and insulin resistance that could be attenuated with phosphonoethylamine
Source: PubMed Central journal article supplement (PMC8776951; doi:10.1038/s41598-022-05140-y), 2022-01-20

Figure 1G and H

ORIGINAL

USED IN MANUSCRIPT

*Pcyt2*<sup>+/+</sup>

*Pcyt2*<sup>+/-</sup>

L-PK

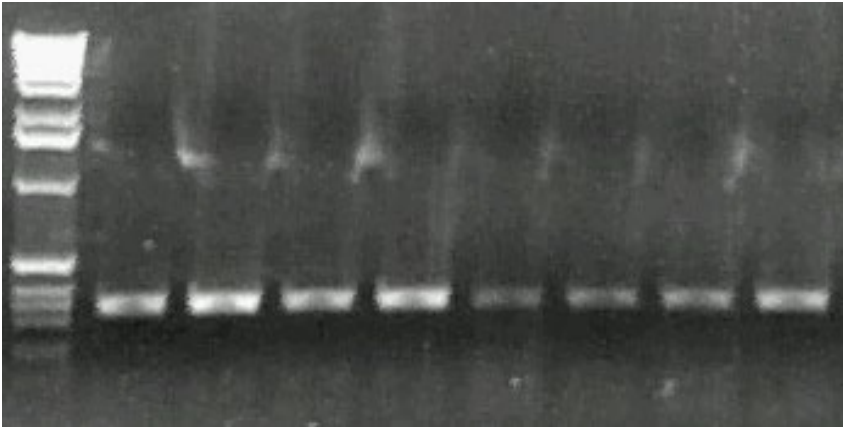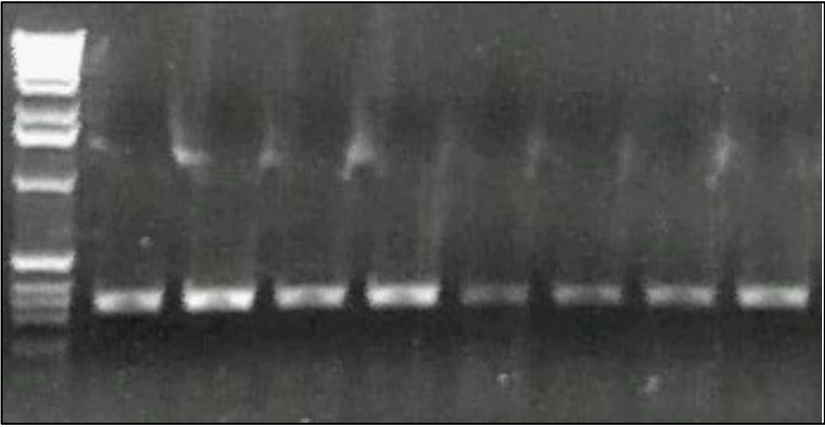

GK

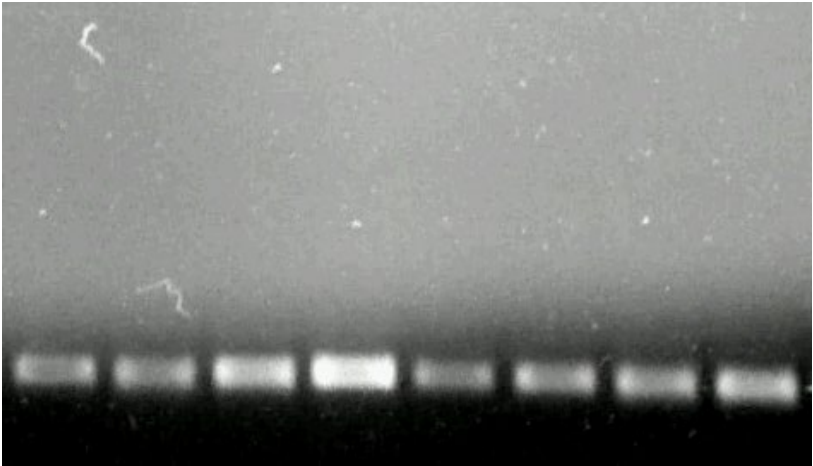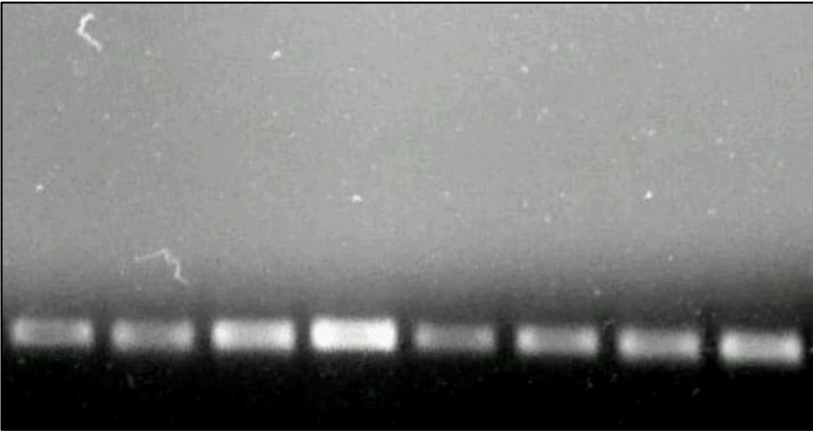

Figure 1G and H

ORIGINAL

USED IN MANUSCRIPT

*Pcyt2*<sup>+/+</sup>

*Pcyt2*<sup>-/-</sup>

G6Pase

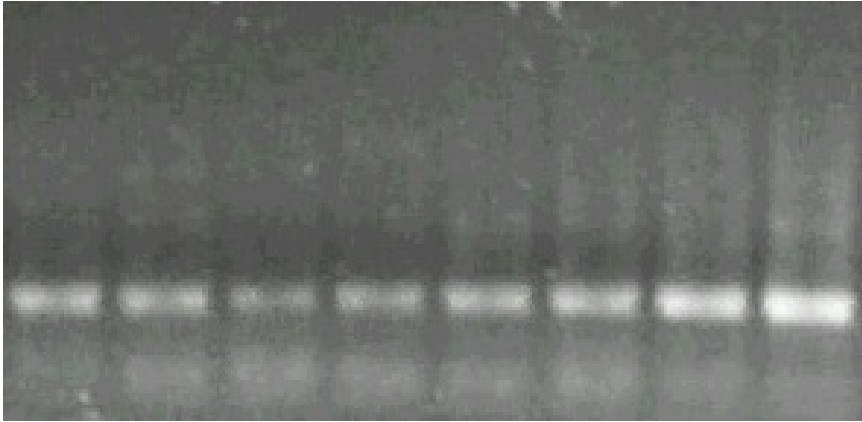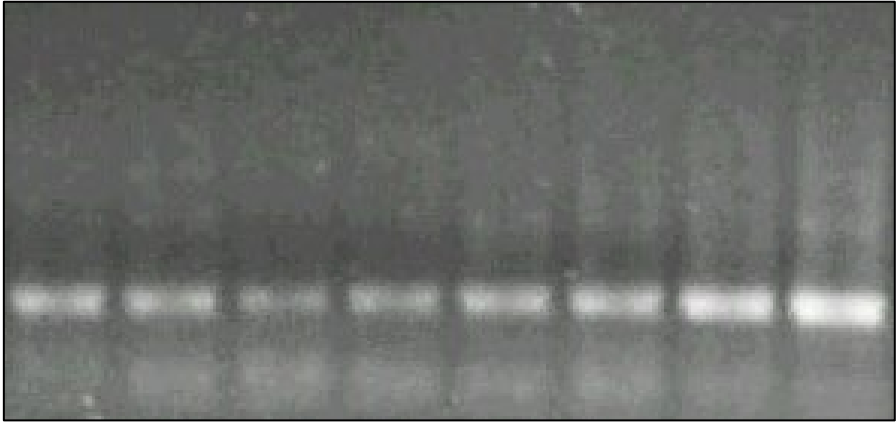

PEPCK

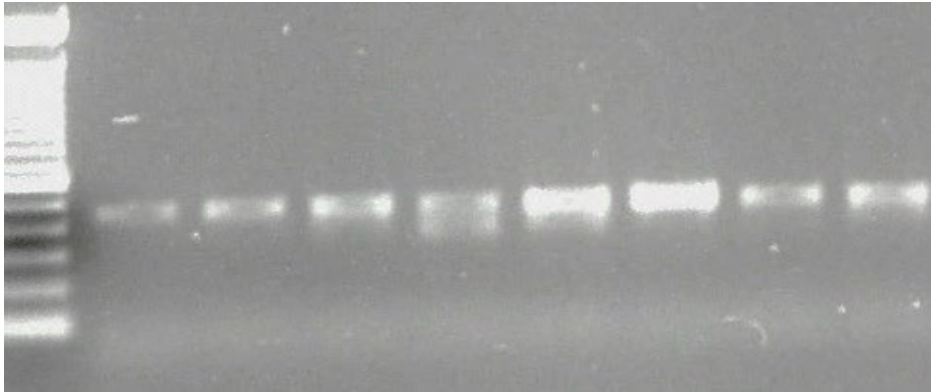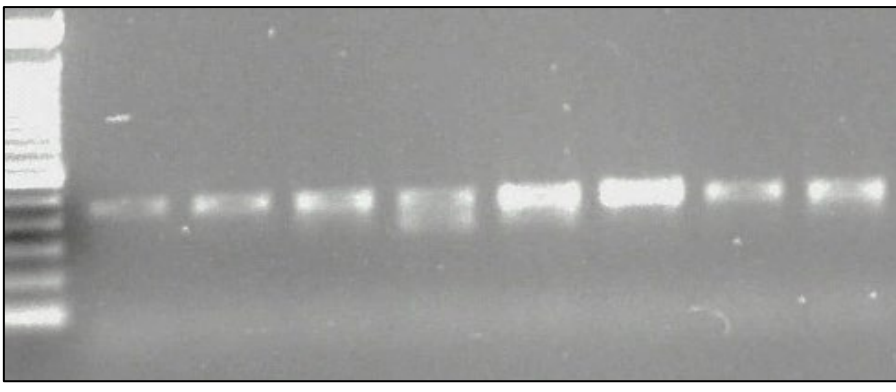

GAPDH

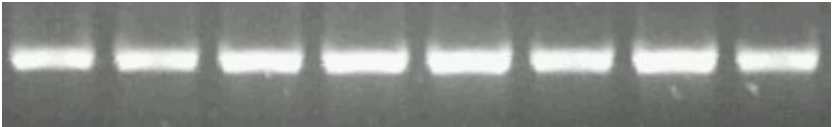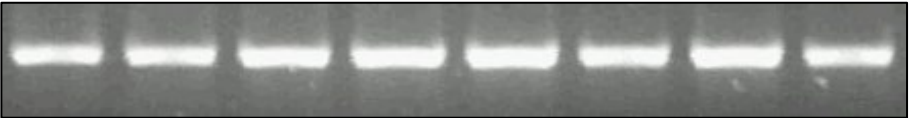

Figure 2D

ORIGINAL

USED IN MANUSCRIPT

Fasted

*Pcyt2*<sup>+/+</sup>

*Pcyt2*<sup>-/-</sup>

Sirt1

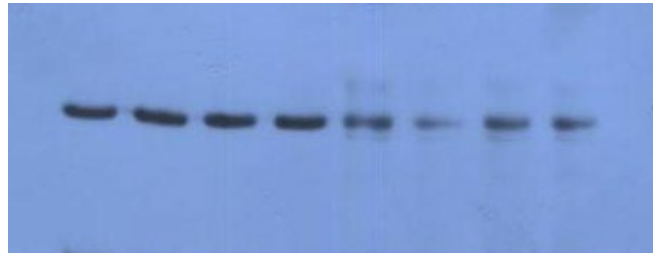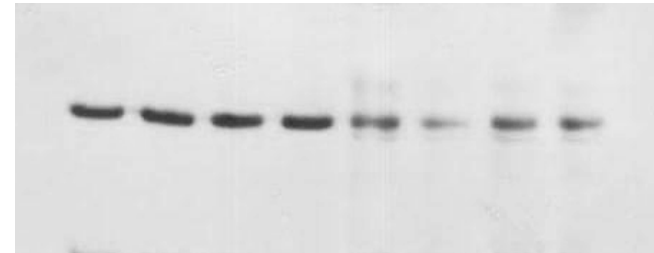

Ampka

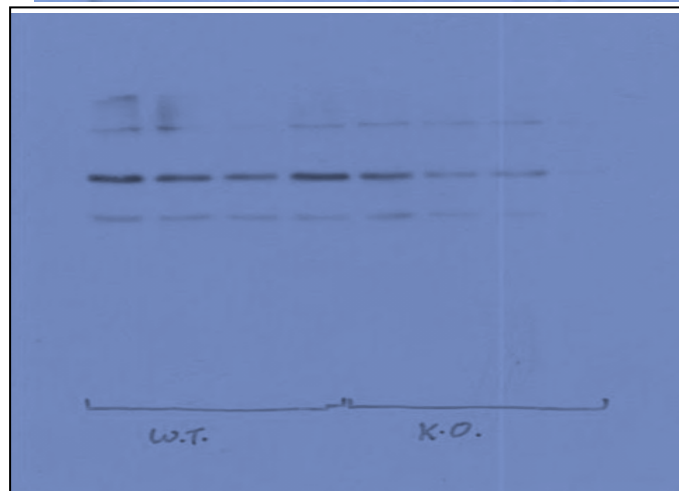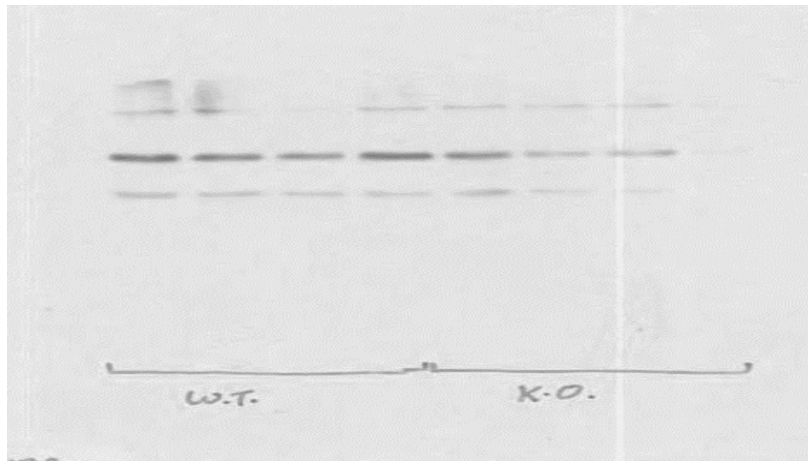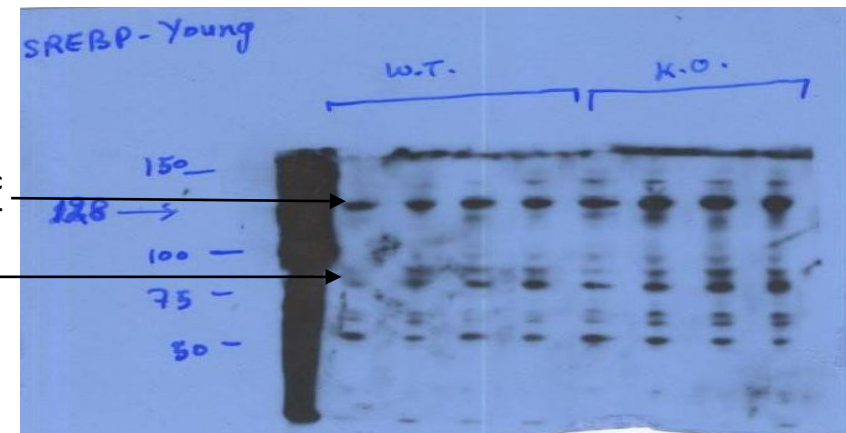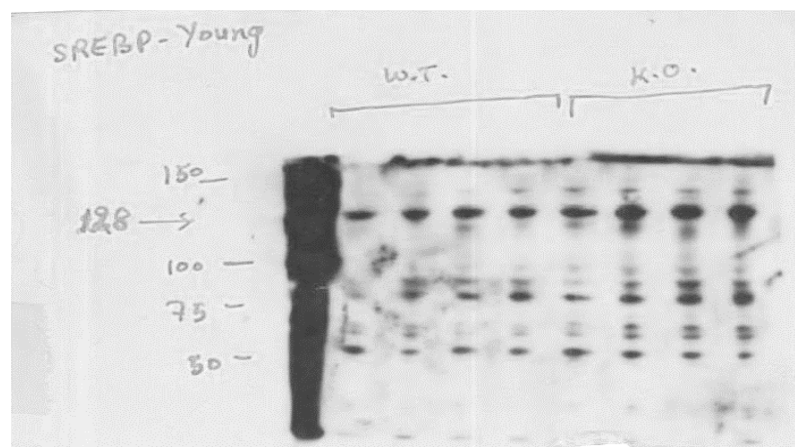

Figure 2D

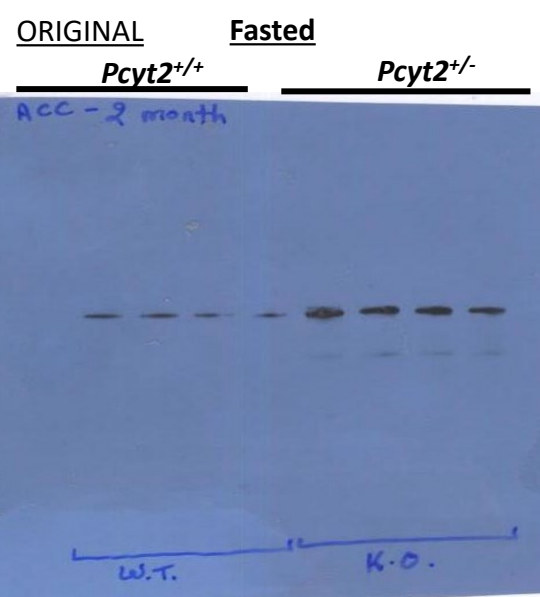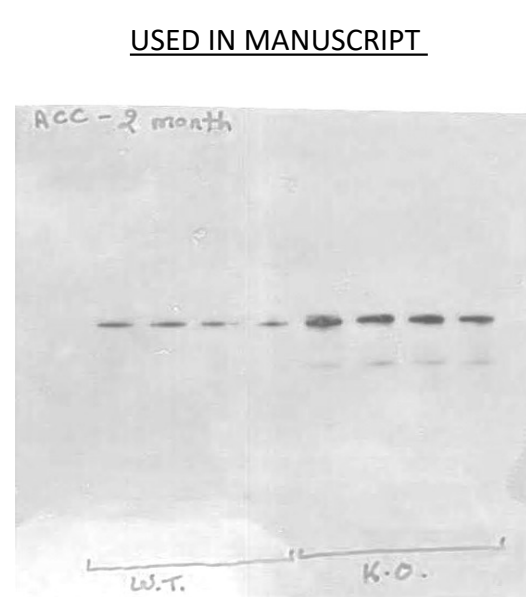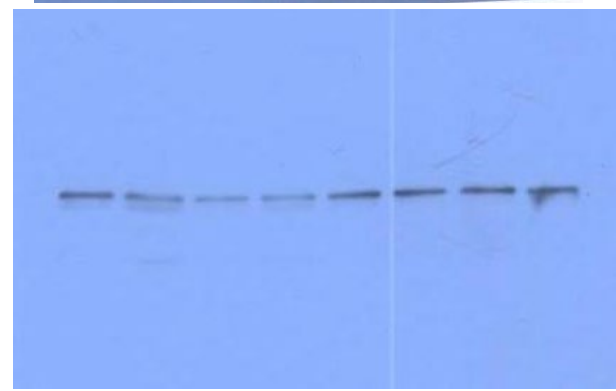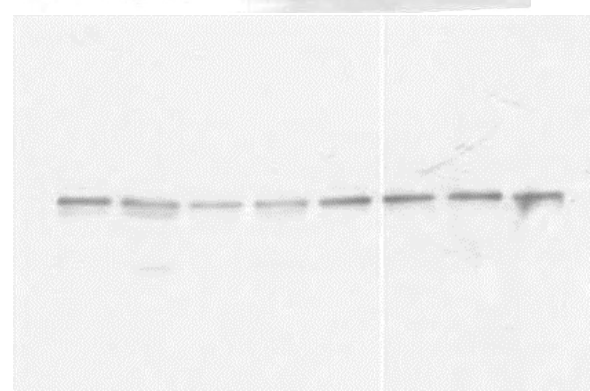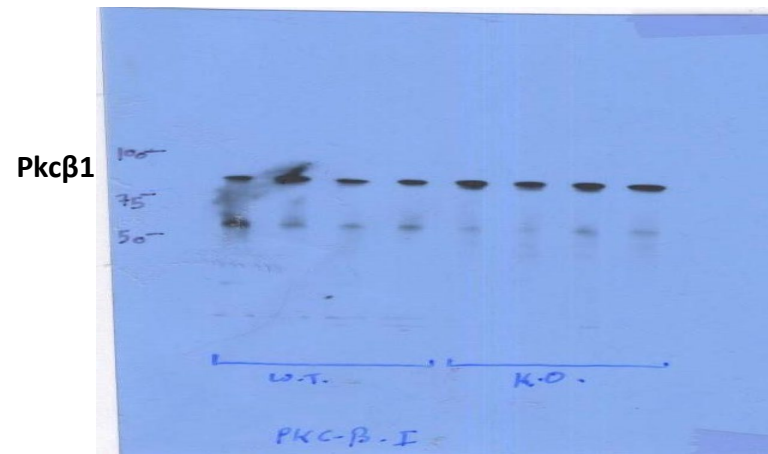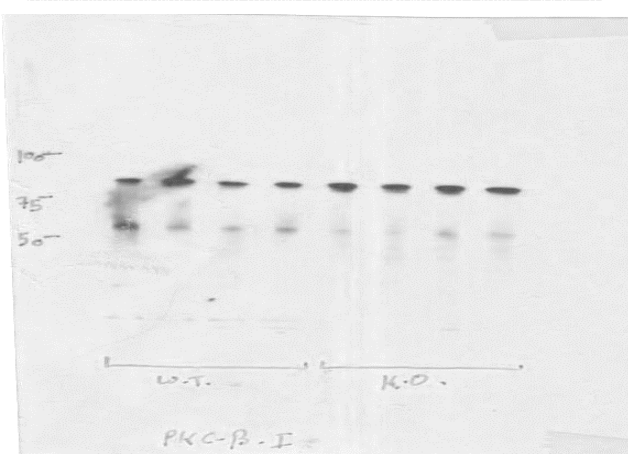



Figure 2D

ORIGINAL

USED IN MANUSCRIPT

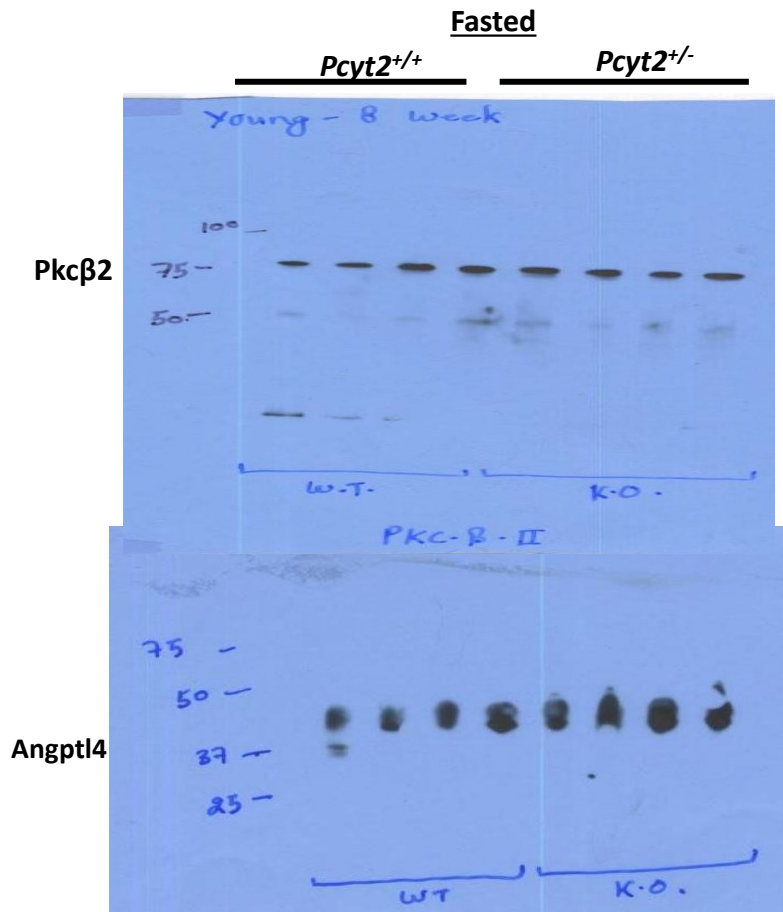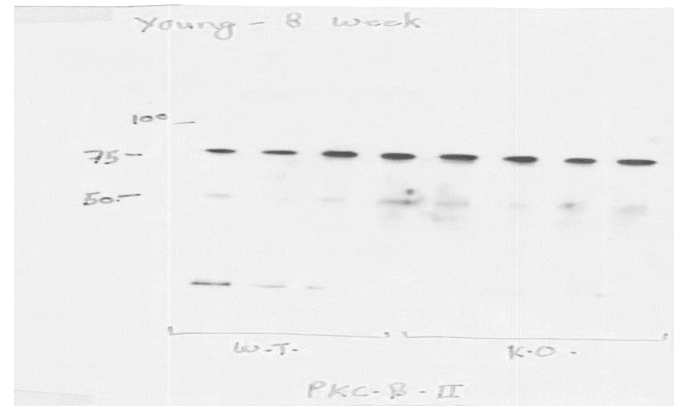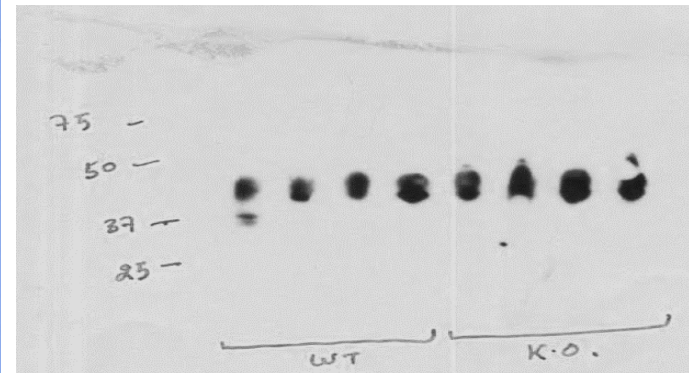

β-Tubulin

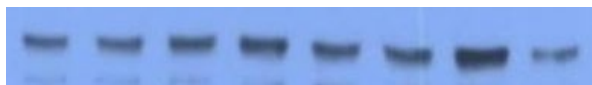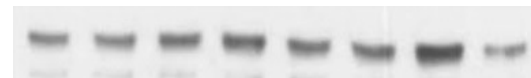

Figure 2D

ORIGINAL

USED IN MANUSCRIPT

Fed

*Pcyt2*<sup>+/+</sup>

*Pcyt2*<sup>+/-</sup>

p-Ampk $\alpha$

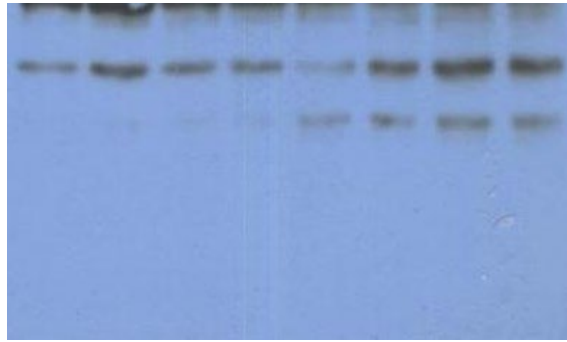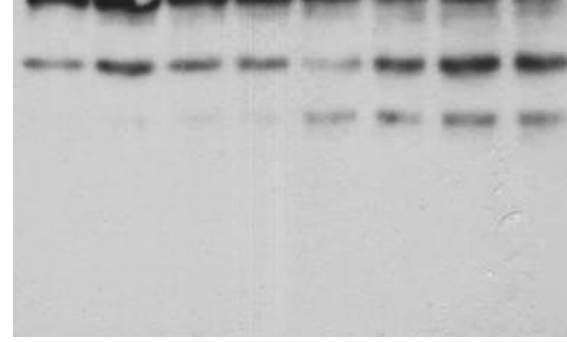

Ampk $\alpha$

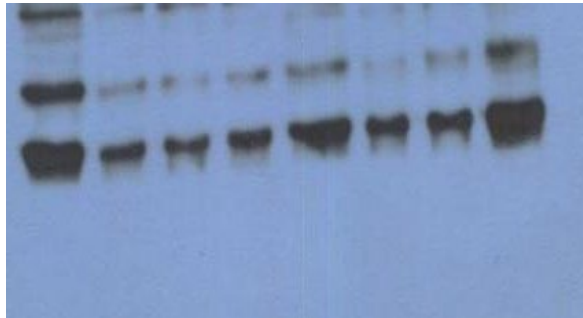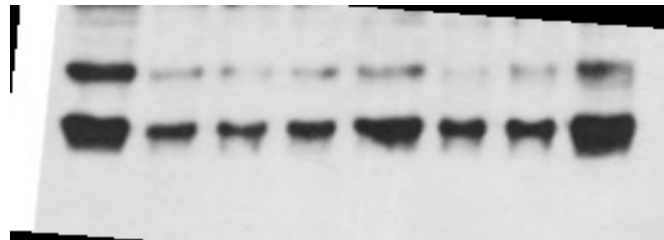

Srebp1c

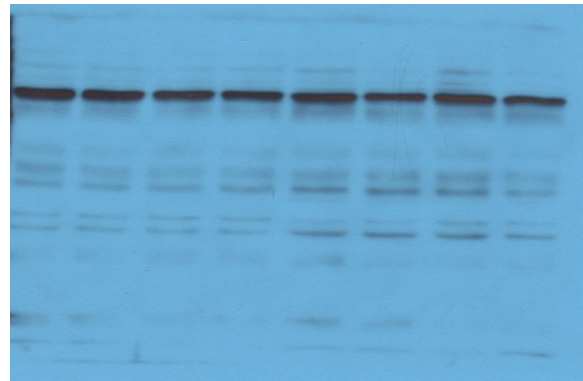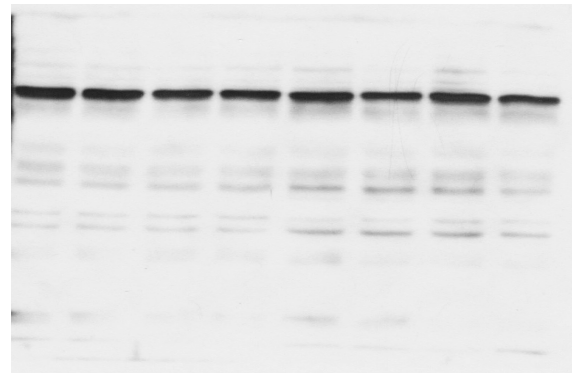

Figure 2D

ORIGINAL

USED IN MANUSCRIPT

*Pcyt2*<sup>+/+</sup>      **Fed**      *Pcyt2*<sup>-/-</sup>

Pkcβ1

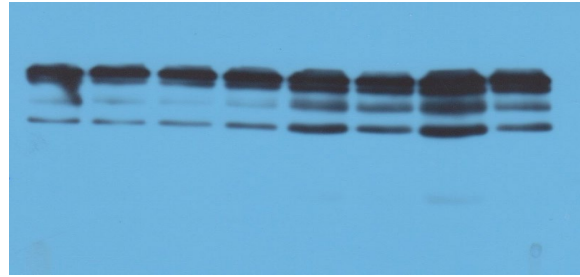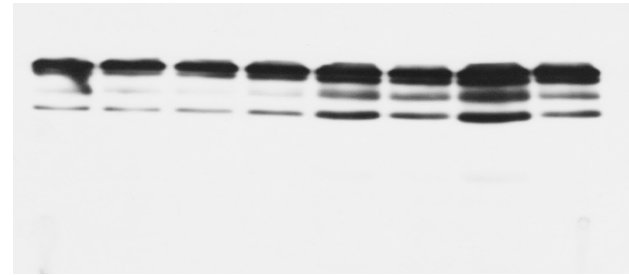

Pkcβ2

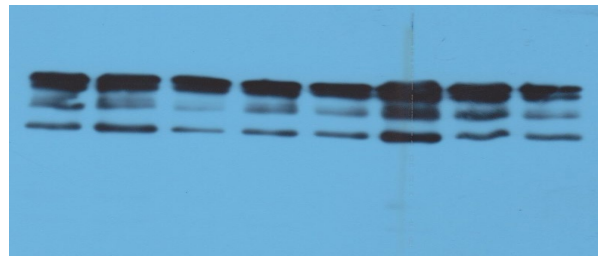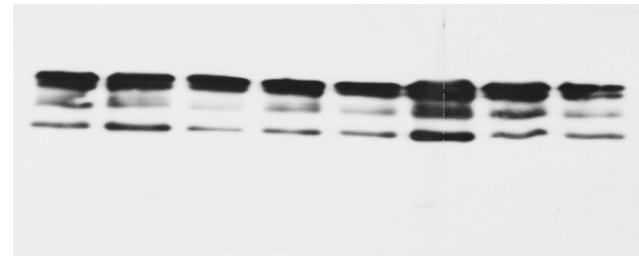

p-Jnk

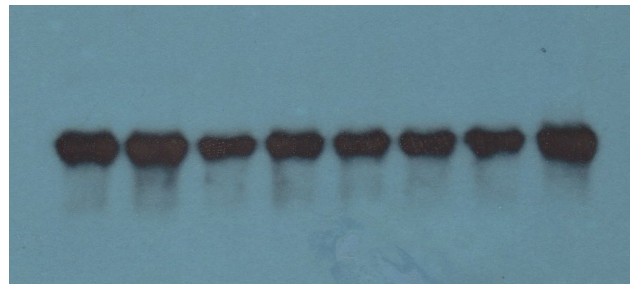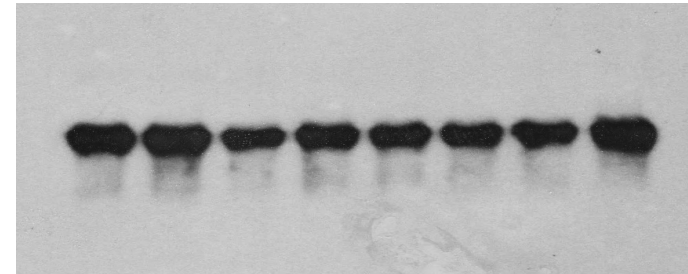

Jnk

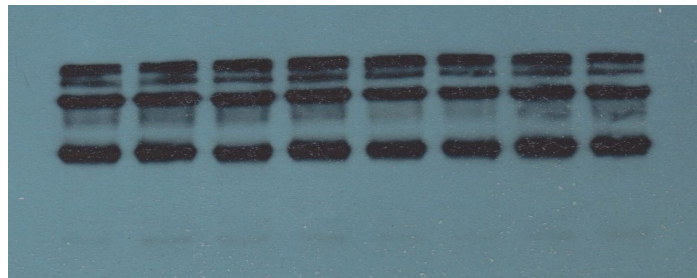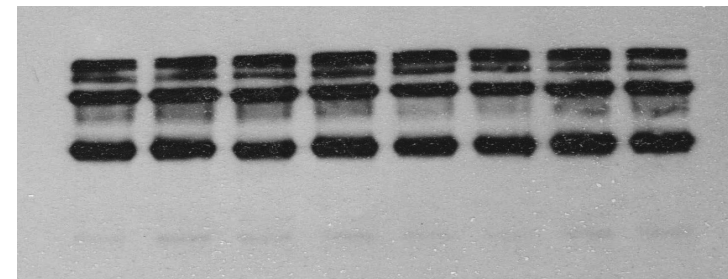

β-Tubulin

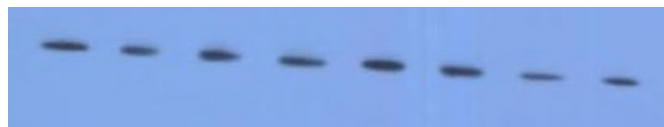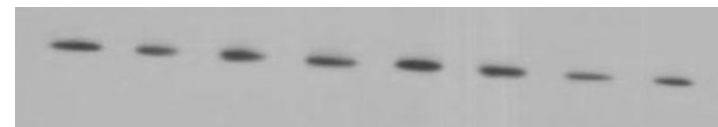

Figure 3C

ORIGINAL

USED IN MANUSCRIPT

Fasted

*Pcyt2*<sup>+/+</sup>

*Pcyt2*<sup>+/-</sup>

IR

pTyr-Irs1

Irs1

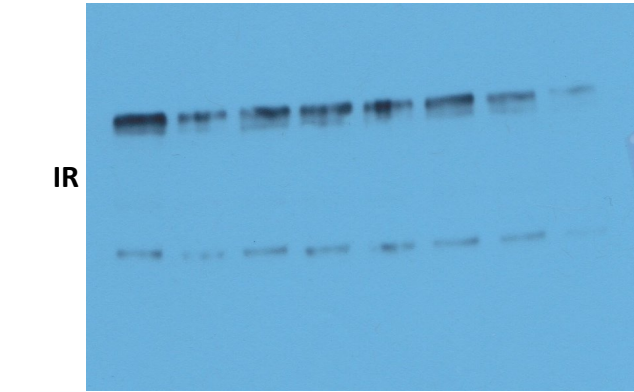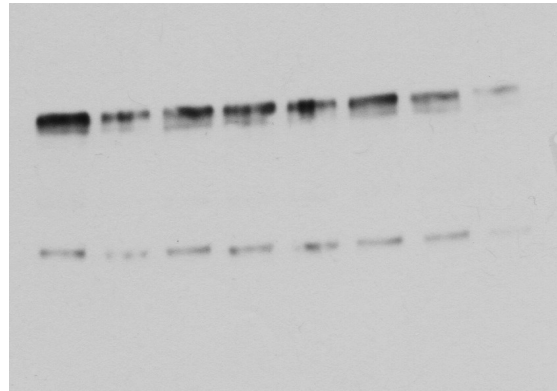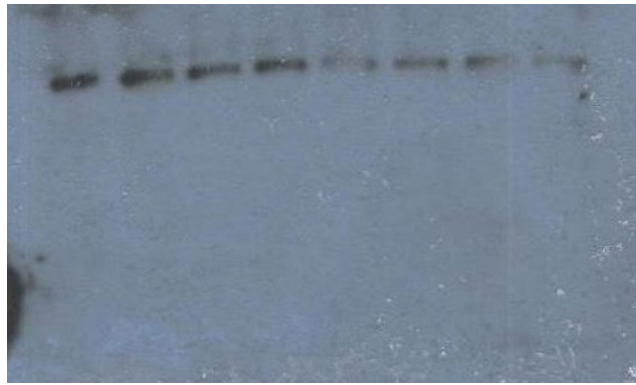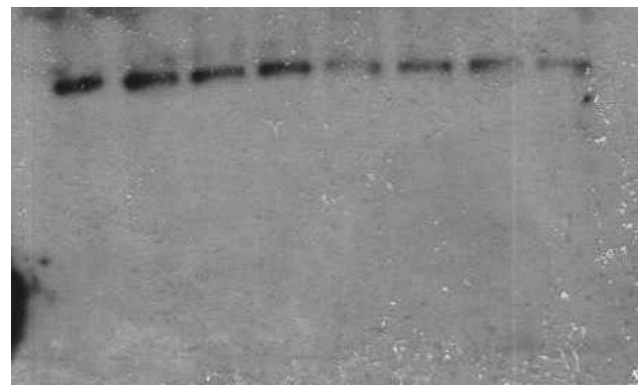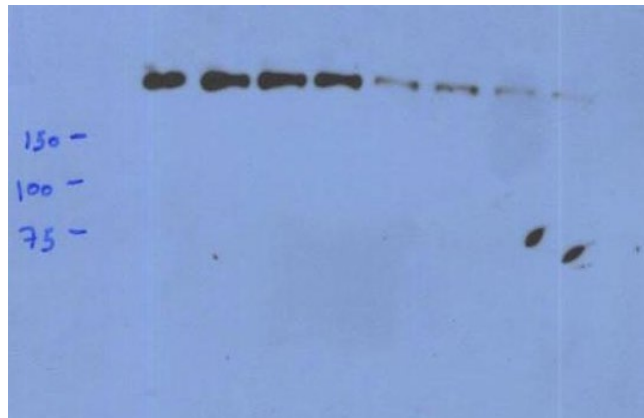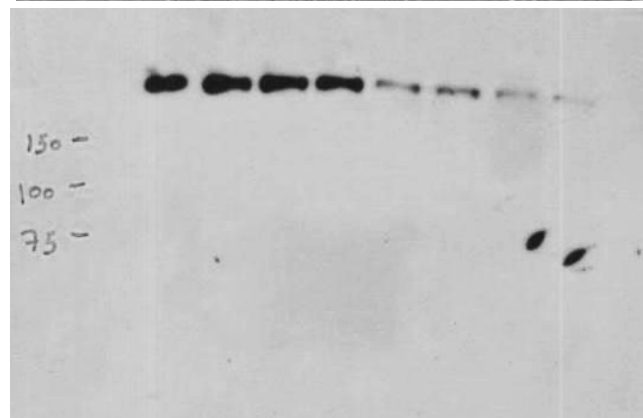



Figure 3C

ORIGINAL

USED IN MANUSCRIPT

Fasted

*Pcyt2<sup>+/+</sup>*

*Pcyt2<sup>+/-</sup>*

p85-Pi3k

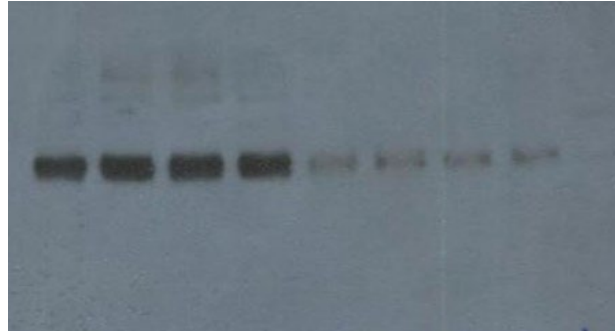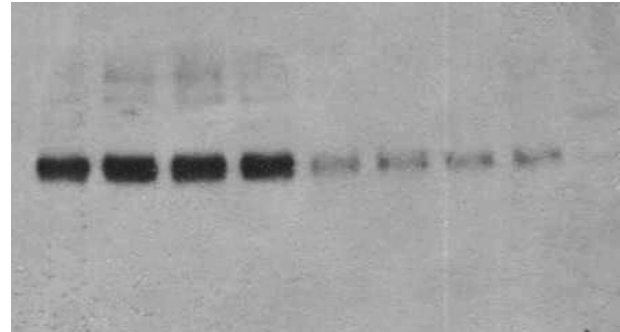

pThr<sup>308</sup>-Akt

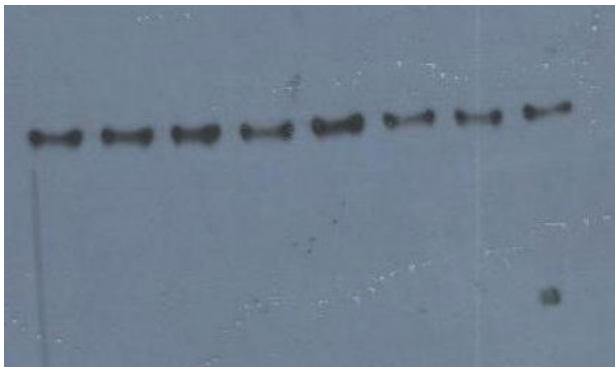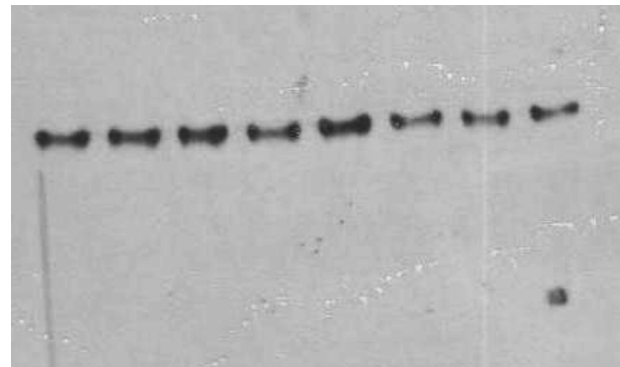

pSer<sup>473</sup>-Akt

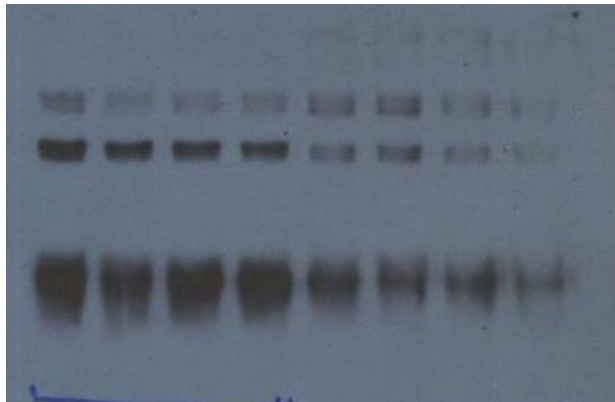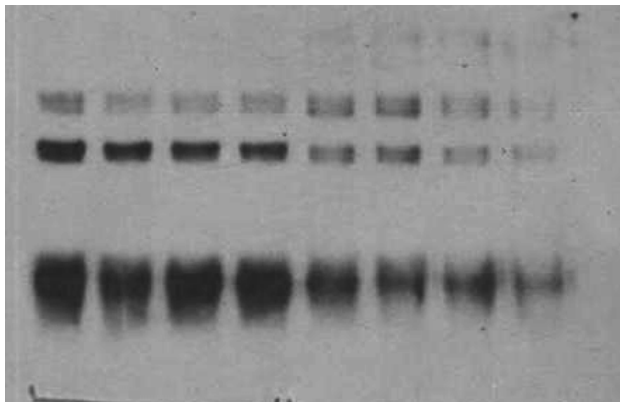

Figure 3C

ORIGINAL

USED IN MANUSCRIPT

Fasted

*Pcyt2<sup>+/+</sup>*

*Pcyt2<sup>+/-</sup>*

Akt1

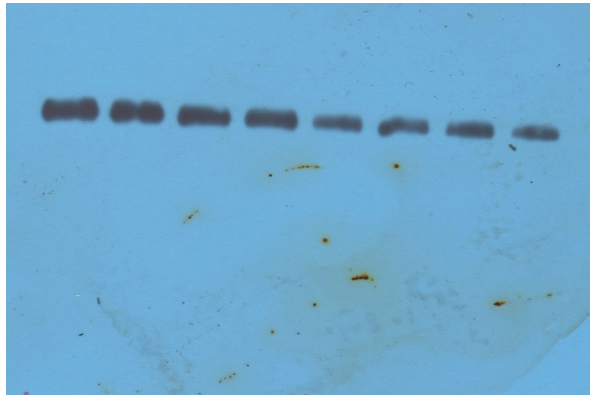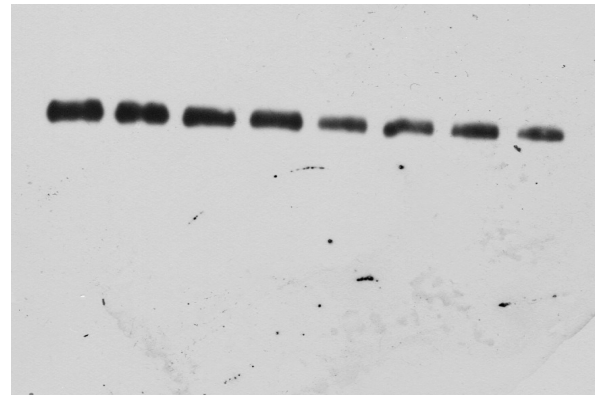

$\beta$ -Tubulin

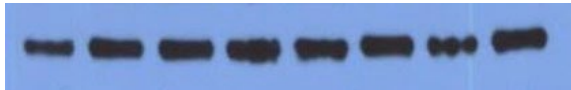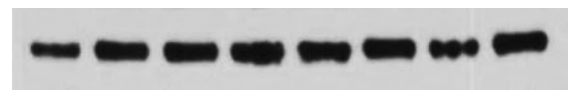

Figure 3C

ORIGINAL

USED IN MANUSCRIPT

Fed

*Pcyt2*<sup>+/+</sup>

*Pcyt2*<sup>+/-</sup>

pTyr-Irs1

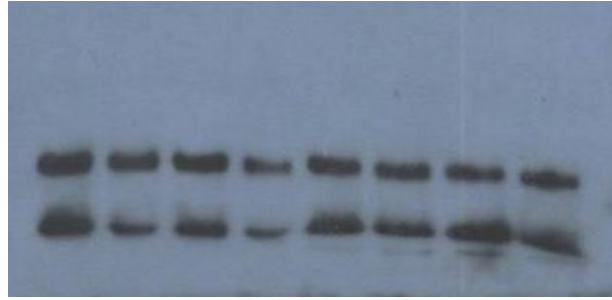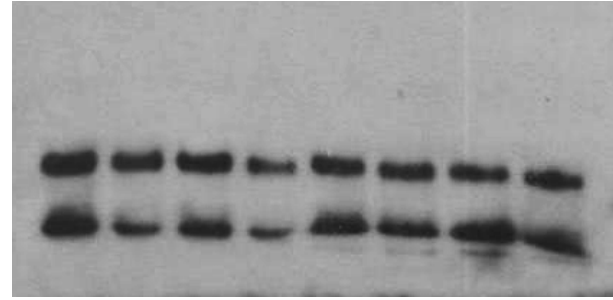

Irs1

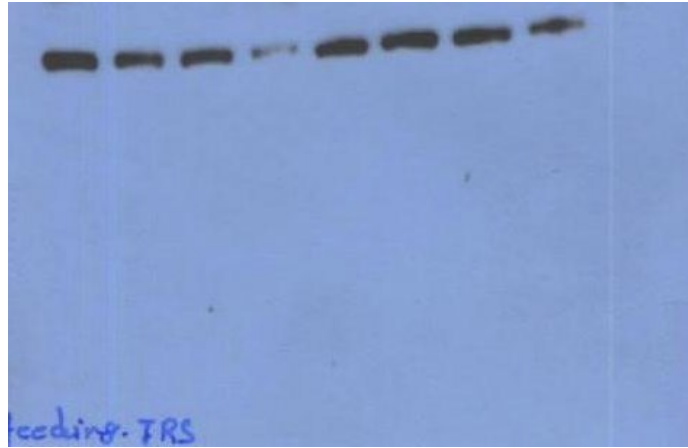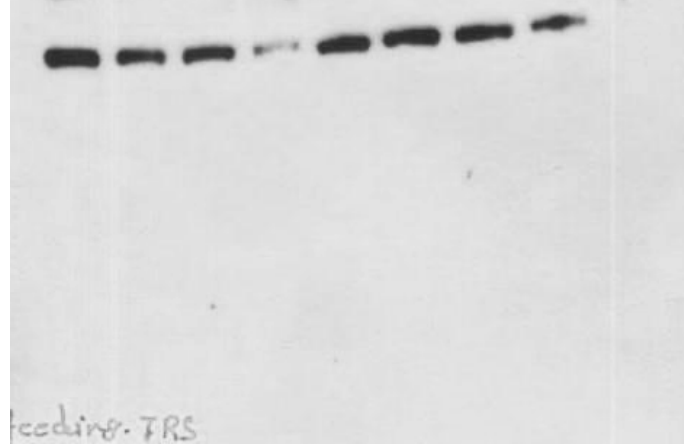

p85-Pi3k

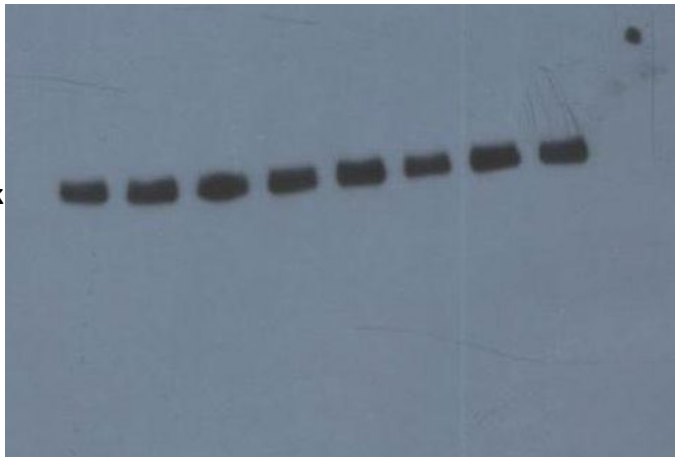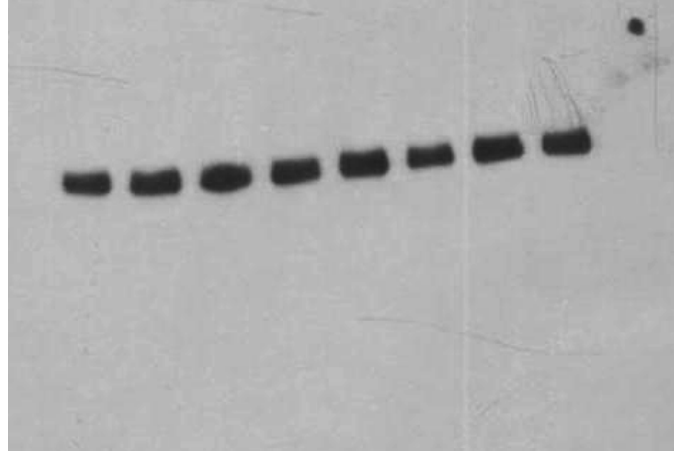

Figure 3C

ORIGINAL

USED IN MANUSCRIPT

Fed

*Pcyt2*<sup>+/+</sup>

*Pcyt2*<sup>-/-</sup>

pThr<sup>308</sup>-Akt

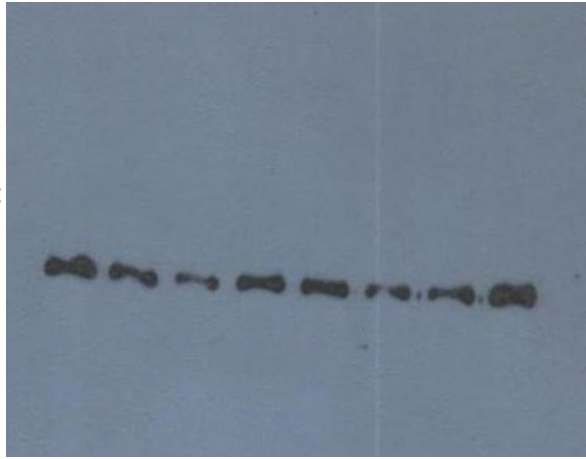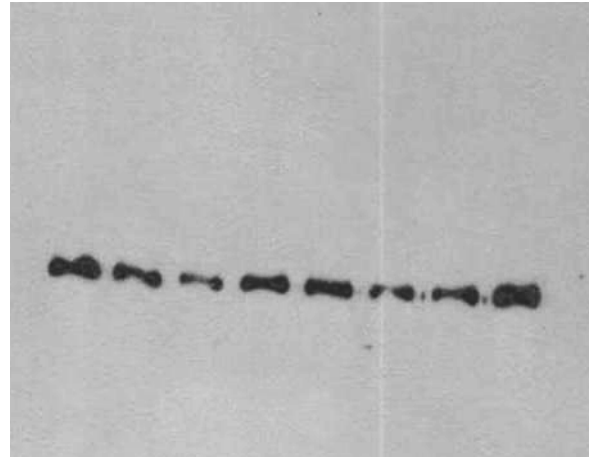

pSer<sup>437</sup>-Akt

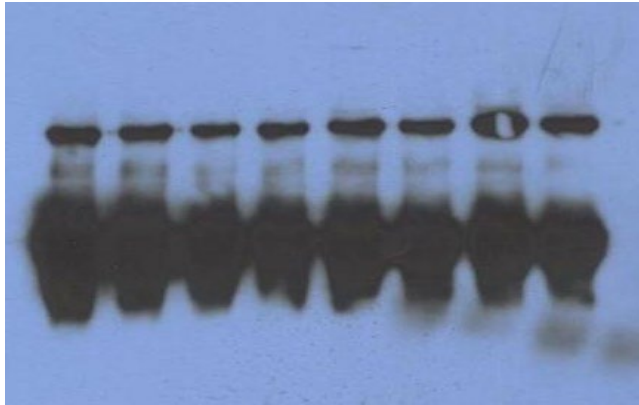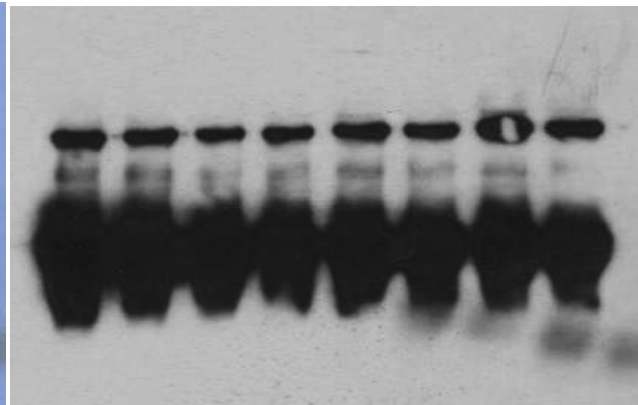

Akt1

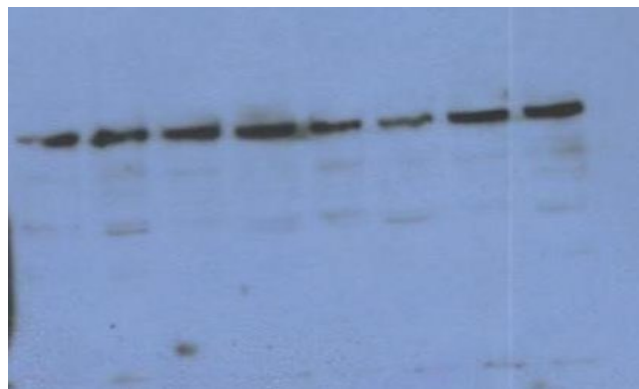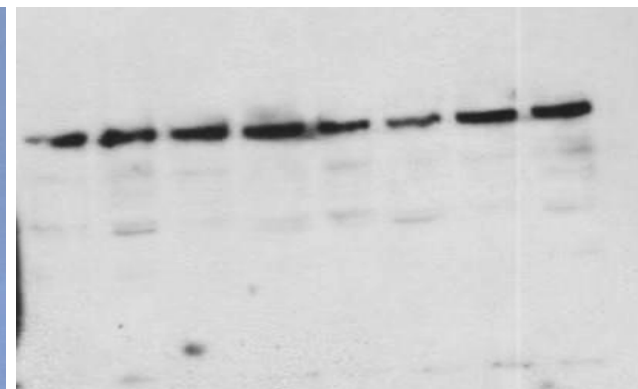



Figure 3C

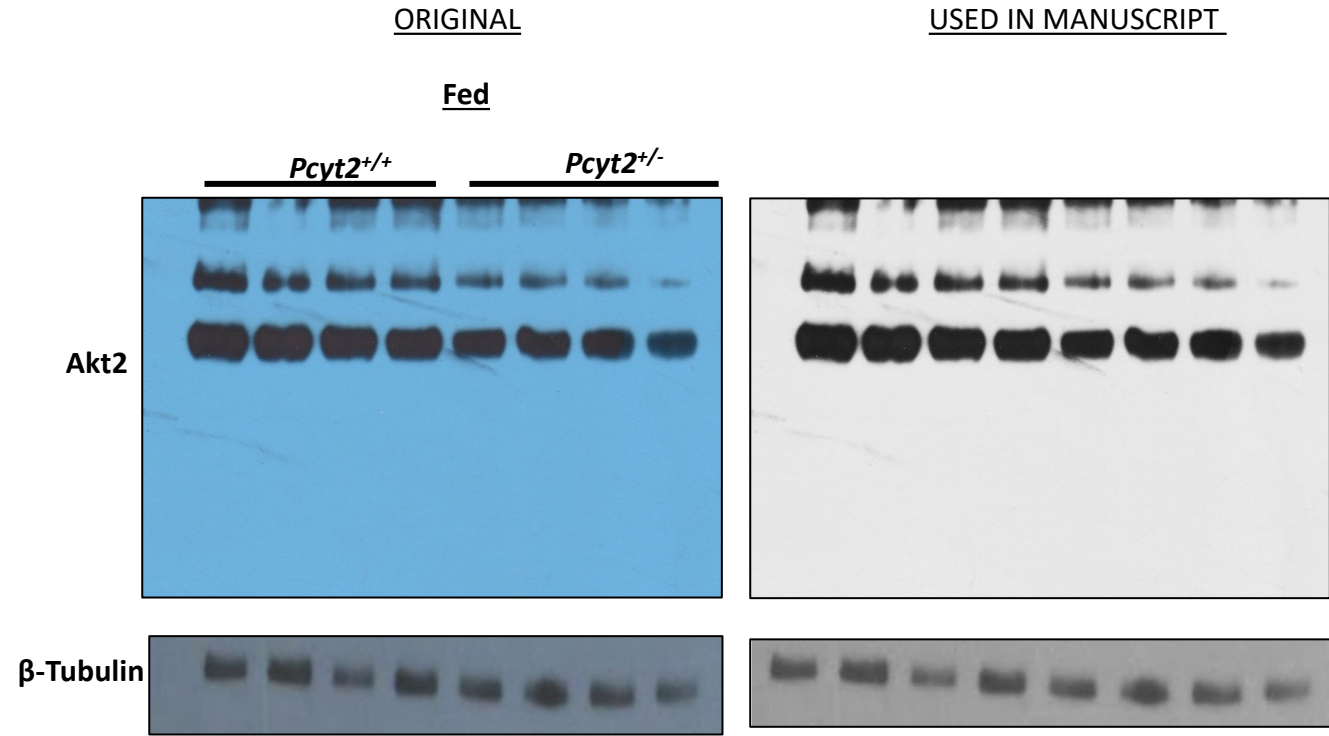

*Pcyt2*<sup>+/+</sup>*Pcyt2*<sup>+/-</sup>

Sirt1

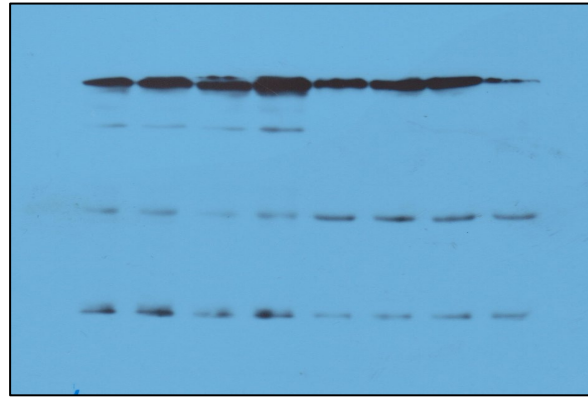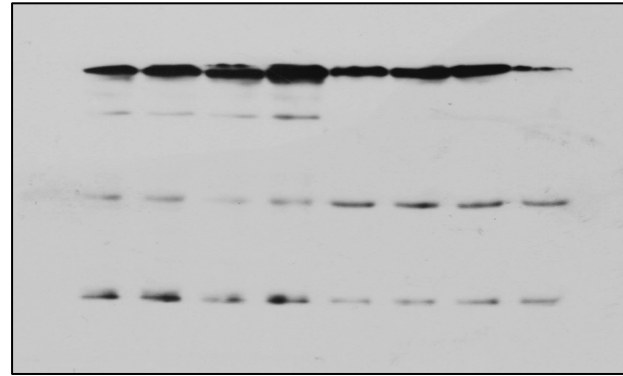p-Ampk $\alpha$ 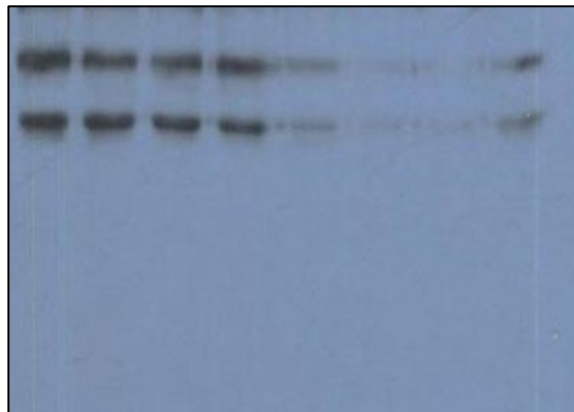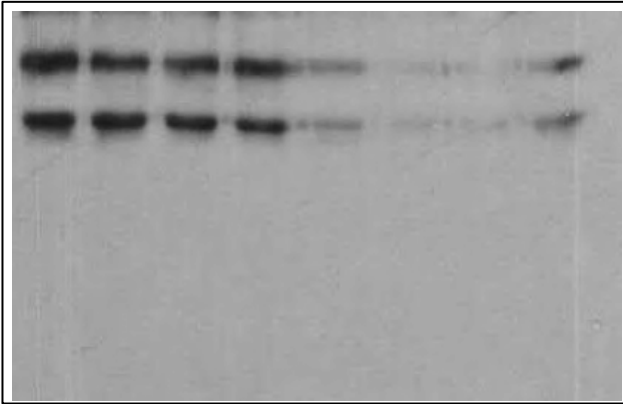Ampk $\alpha$ 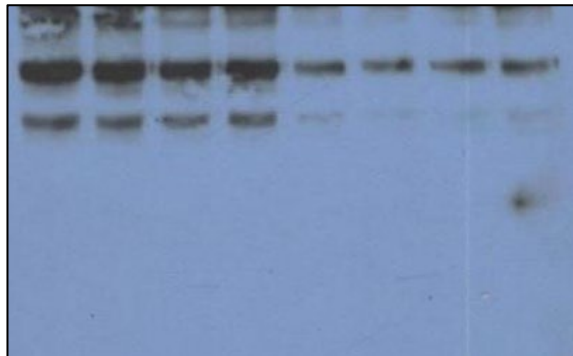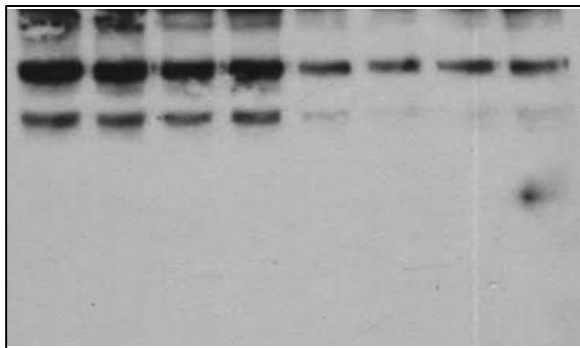

Supplementary Figure 1

ORIGINAL

USED IN MANUSCRIPT

*Pcyt2*<sup>+/+</sup>

*Pcyt2*<sup>+/-</sup>

Srebp1c precursor

Srebp1c active

Acc

PKC $\alpha$

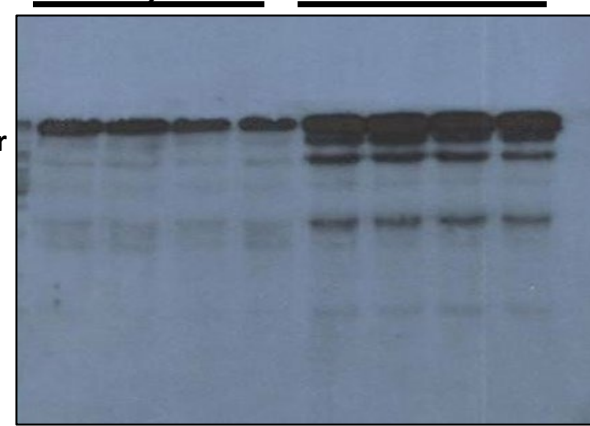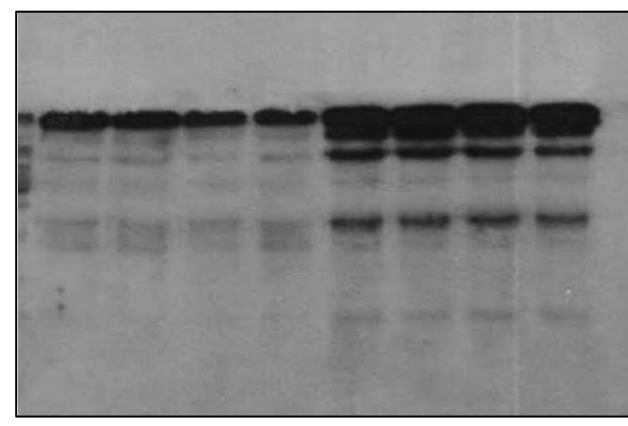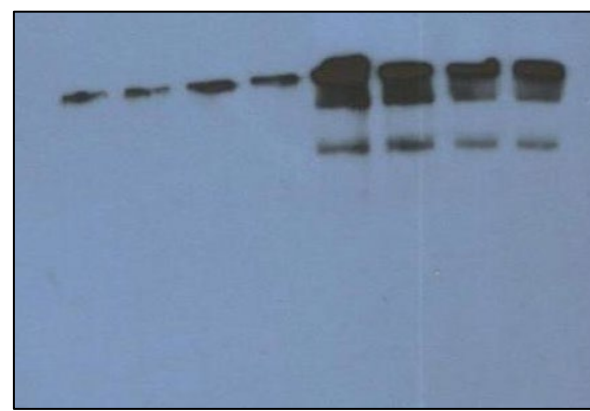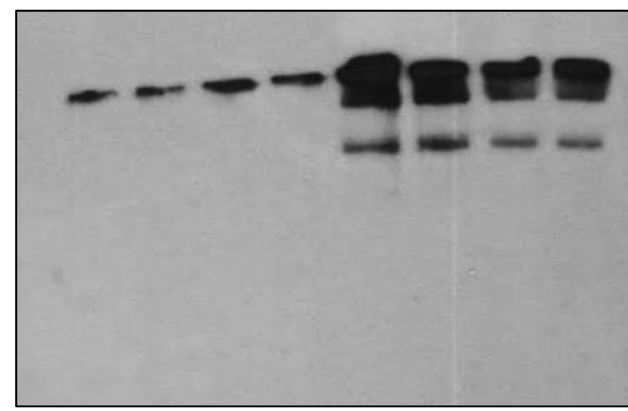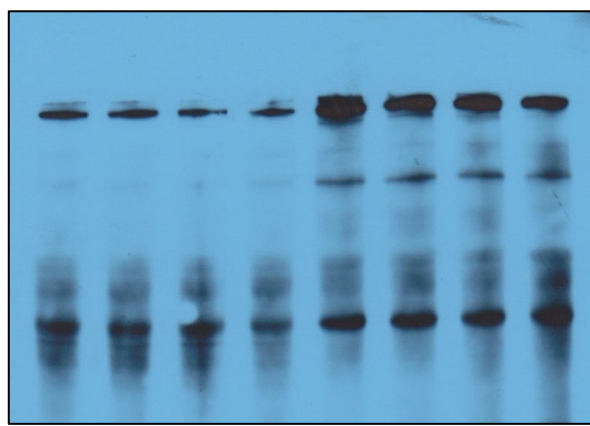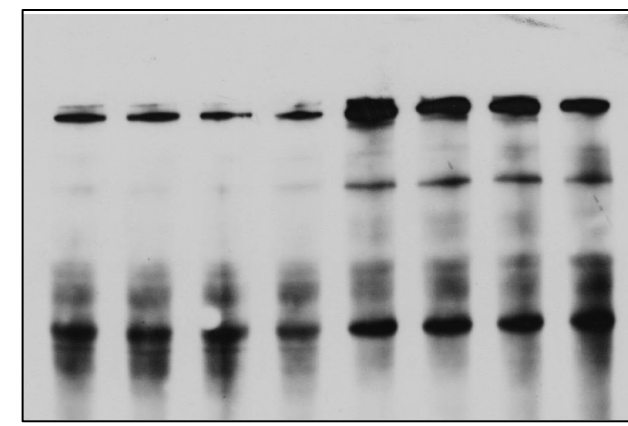

Supplementary Figure 1

ORIGINAL

USED IN MANUSCRIPT

*Pcyt2*<sup>+/+</sup>

*Pcyt2*<sup>-/-</sup>

PKC $\beta$ 1

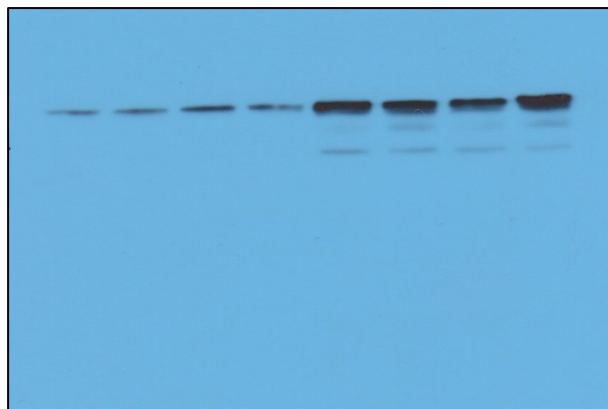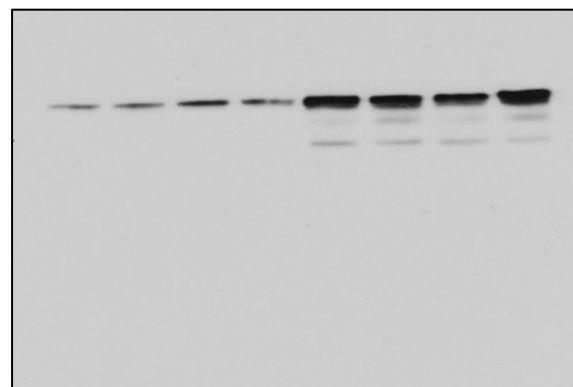

PKC $\beta$ 2

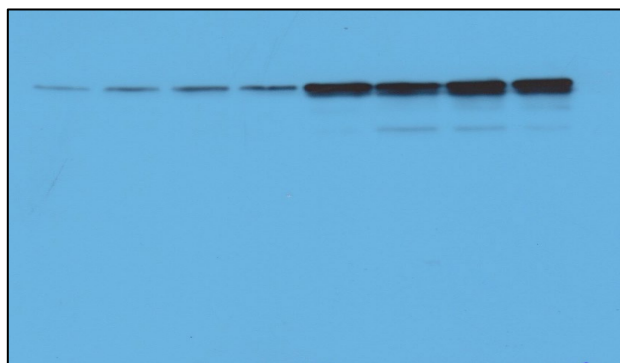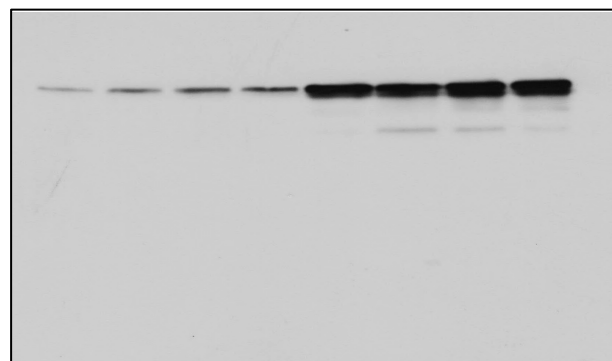

$\beta$ -Tubulin

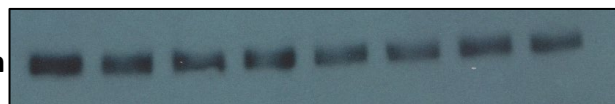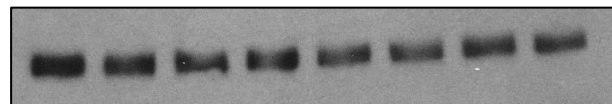



Figure 4A

ORIGINAL

USED IN MANUSCRIPT

*Pcyt2*<sup>+/+</sup>

*Pcyt2*<sup>+/-</sup>

*Pcyt2*<sup>+/-</sup>+PEtn

Pcyt2 $\alpha$

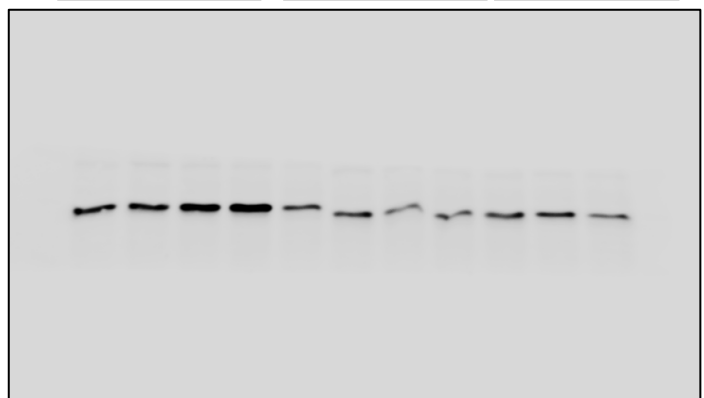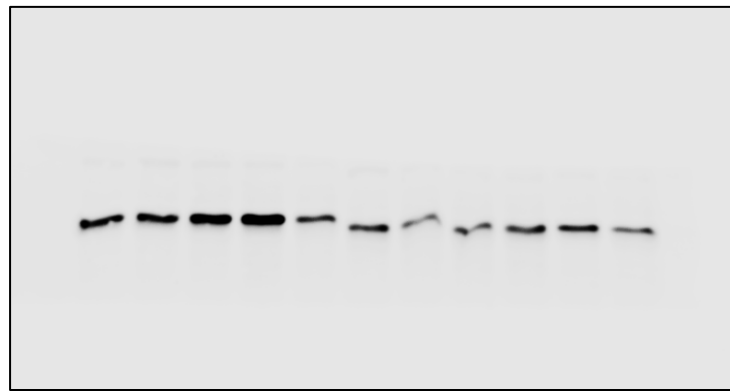

Pcyt2 $\alpha$  and CTL1 membranes were cut prior to antibody hybridization

Ponceau S

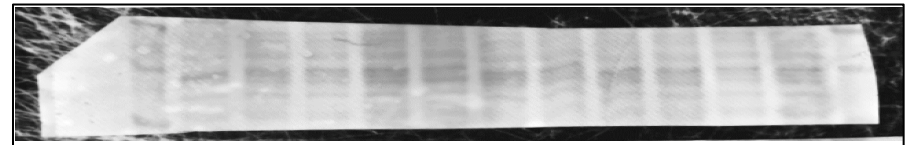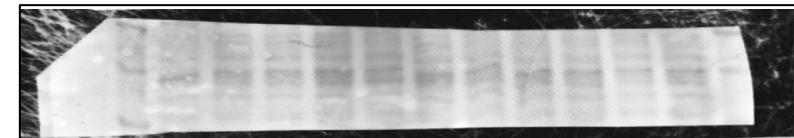

Ctl1

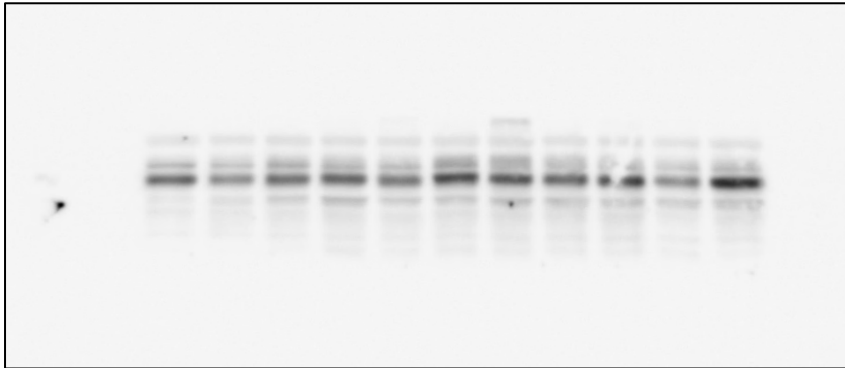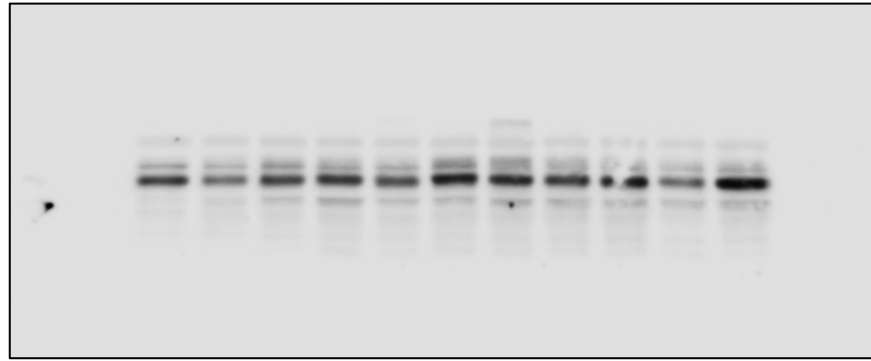

Ponceau S

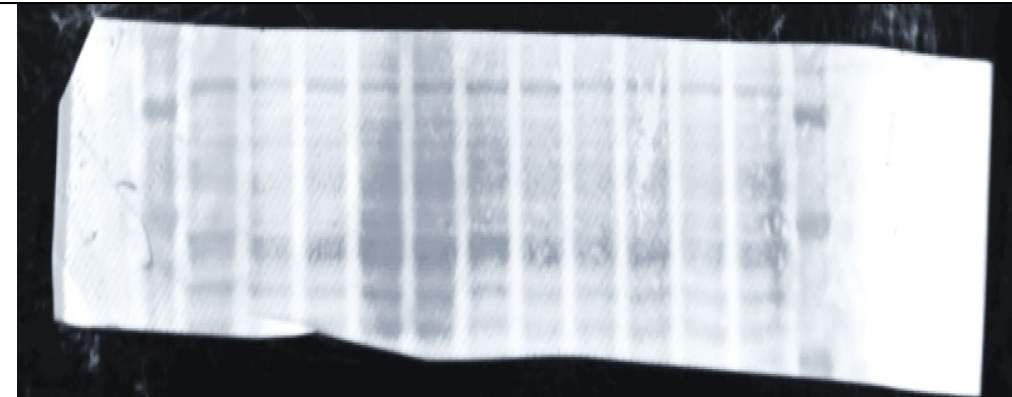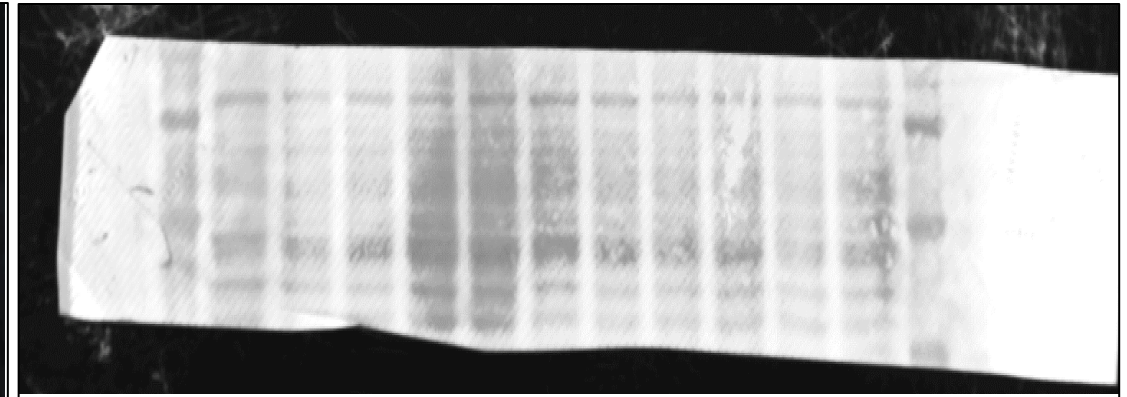

Figure 5A

Pkc $\alpha$  and Pkc $\beta$ 1 membranes were cut prior to antibody hybridization

ORIGINAL

USED IN MANUSCRIPT

*Pcyt2*<sup>+/+</sup>

*Pcyt2*<sup>+/-</sup>

*Pcyt2*<sup>+/-</sup>+PEtn

Pkc $\alpha$

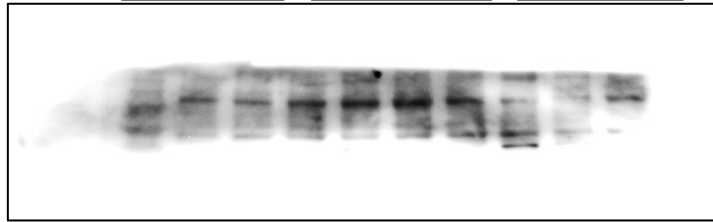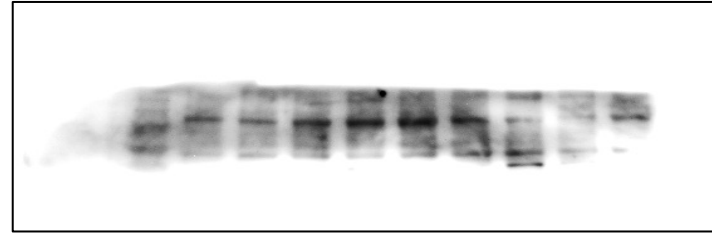

Pkc $\beta$ 1

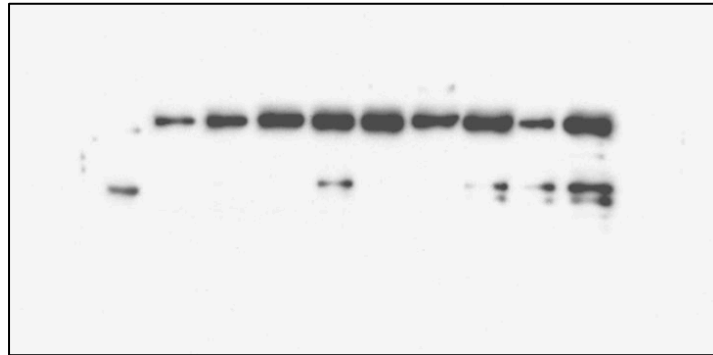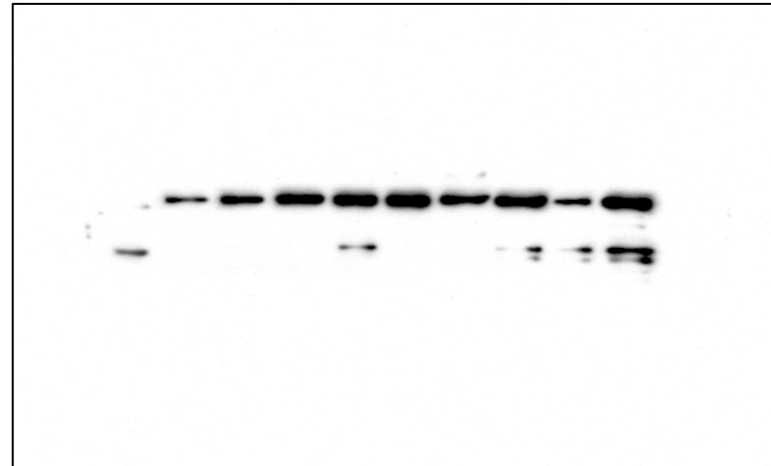

Figure 5A

p-Foxo1 and  $\beta$ -Actin membranes were cut prior to antibody hybridization

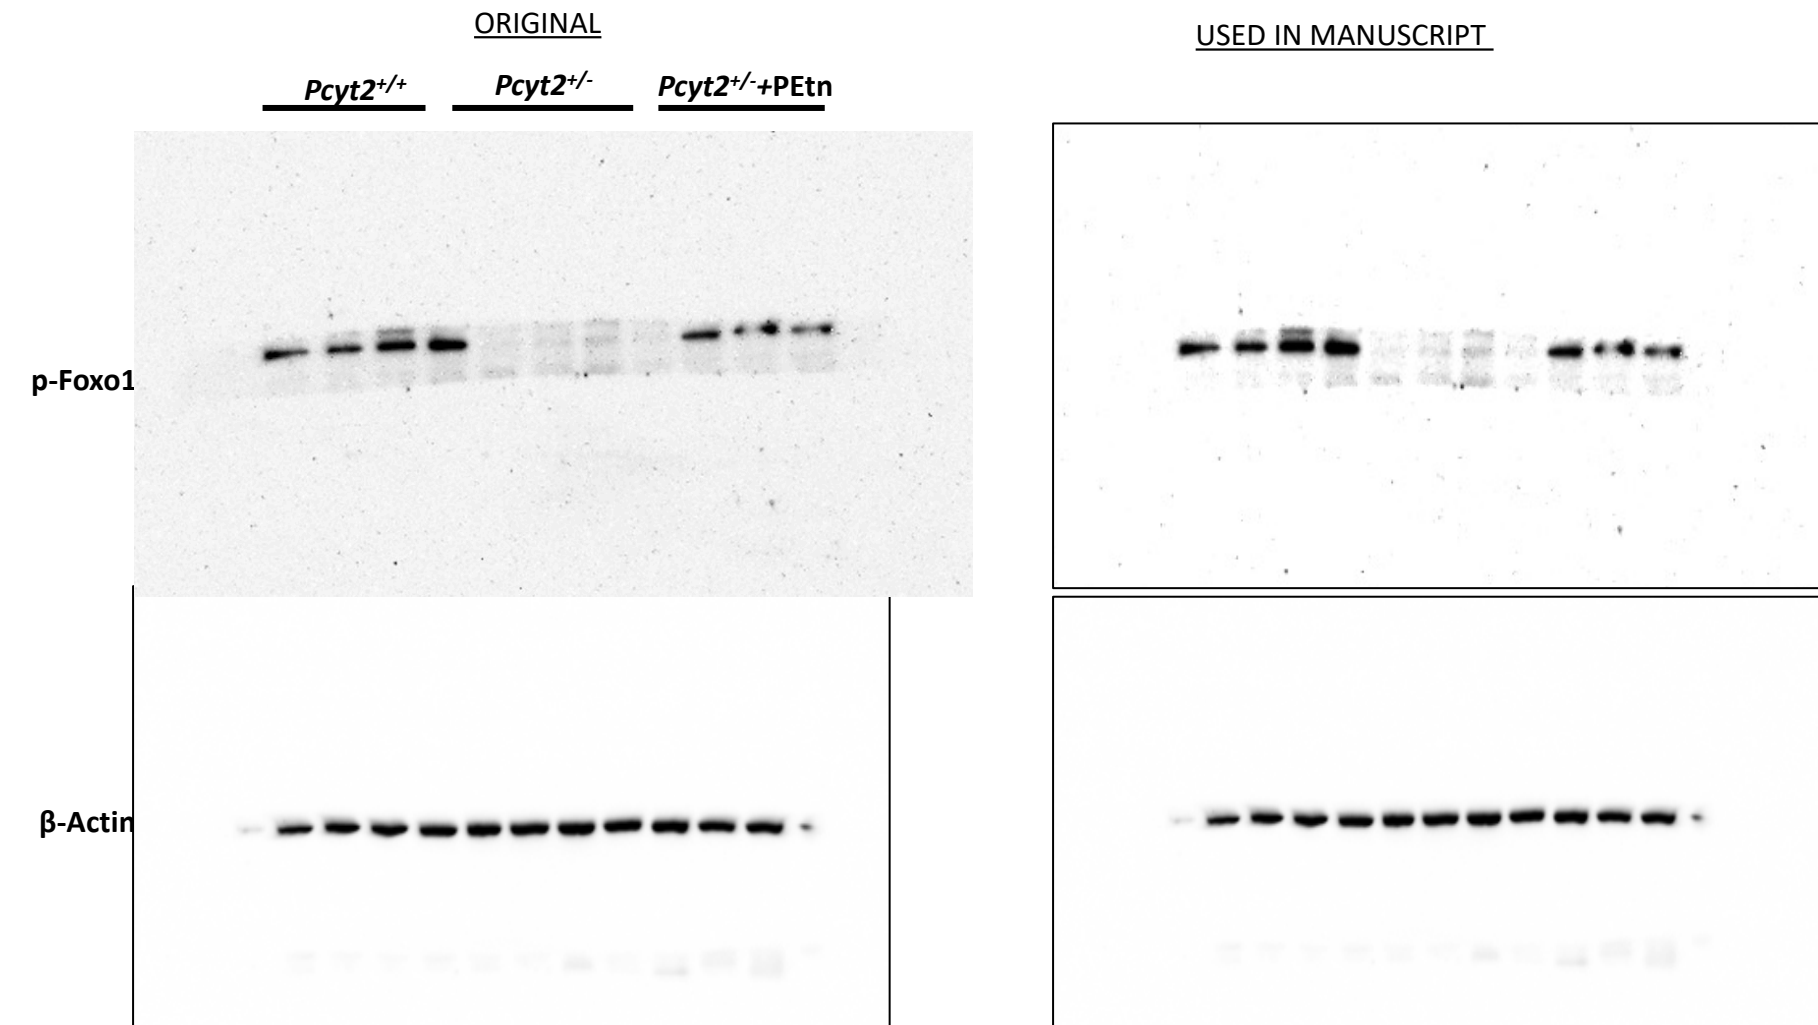

Figure 5B

Sirt1, Pgc1 $\alpha$  and p-Ampk $\alpha$  membranes were cut prior to antibody hybridization

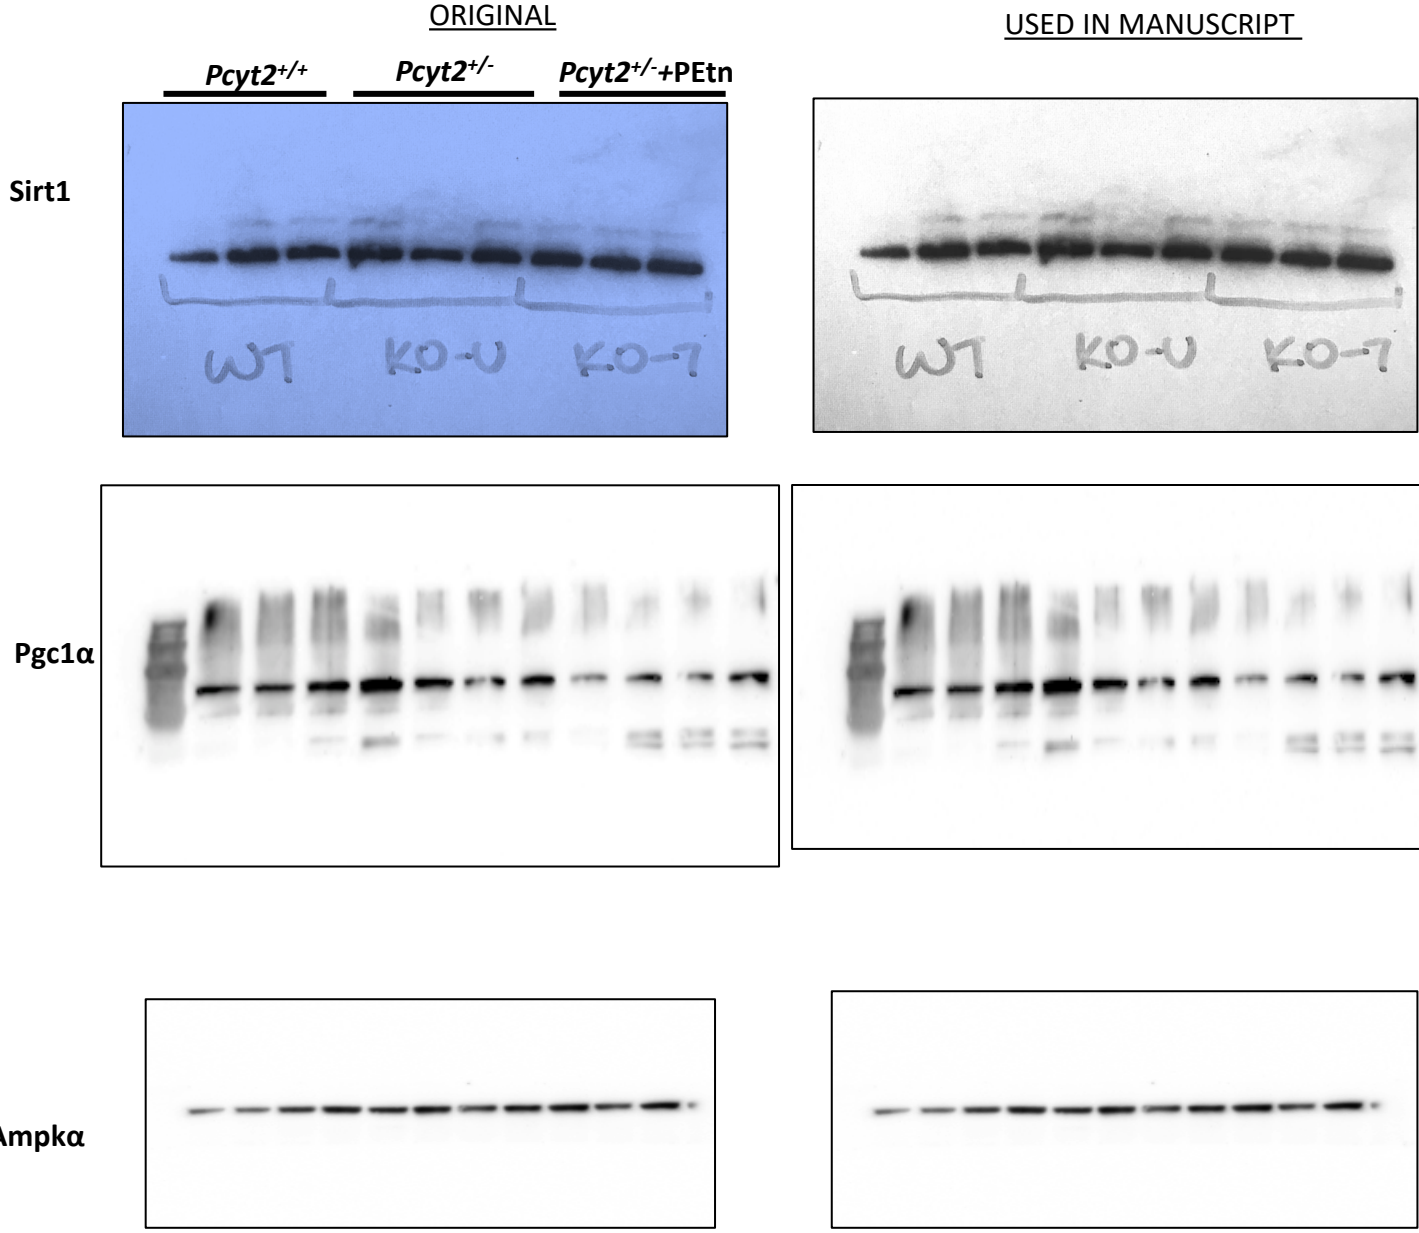



Ampk $\alpha$  and p-p70 S6K membranes were cut prior to antibody hybridization

Figure 5B

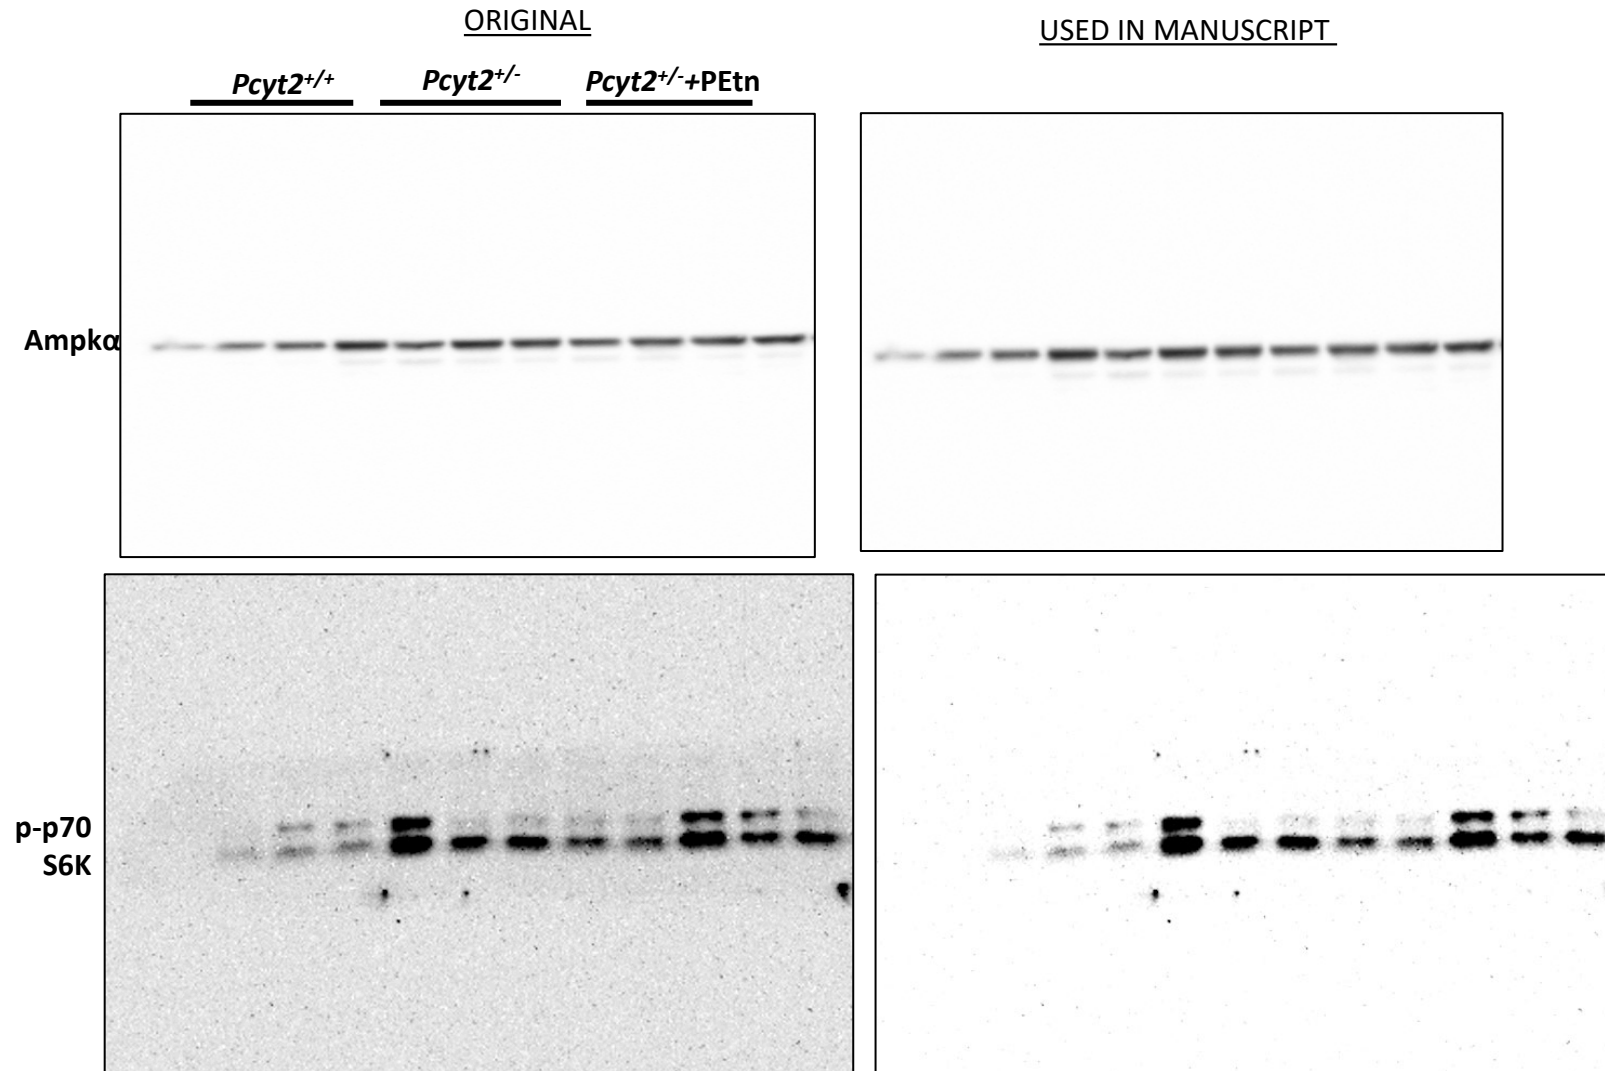

Figure 5B mTorc1 and B-Actin membranes were cut prior to antibody hybridization

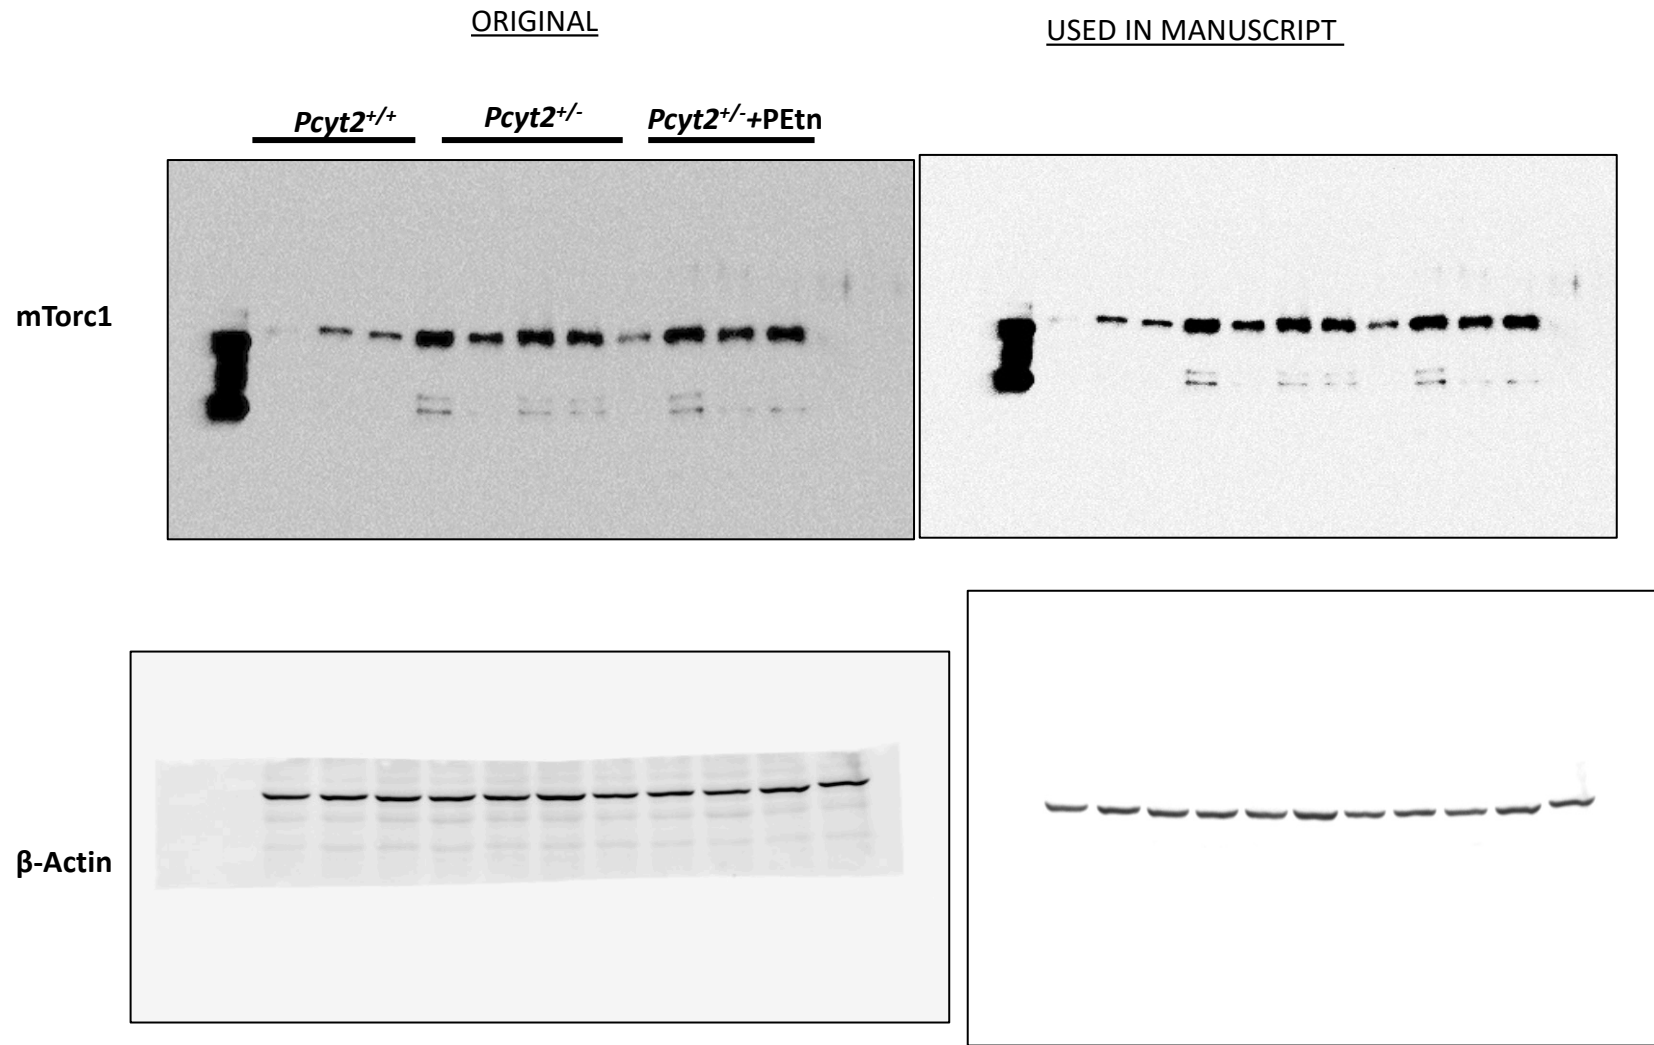

Figure 6C

ORIGINAL

USED IN MANUSCRIPT

Traf6

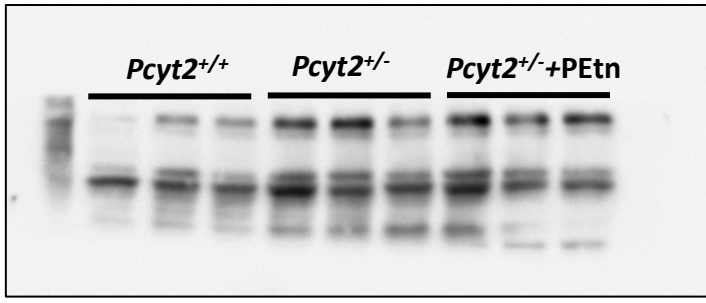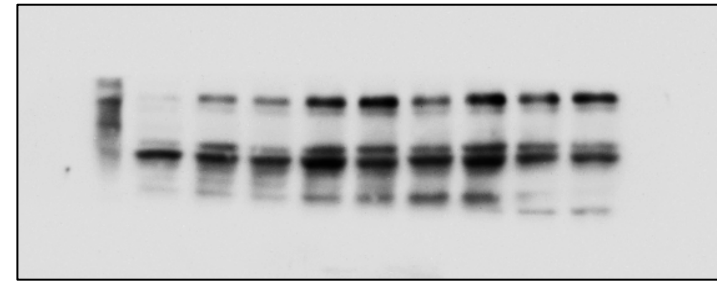

Traf6, Nfkb membranes were cut prior to antibody hybridization

Nfkb

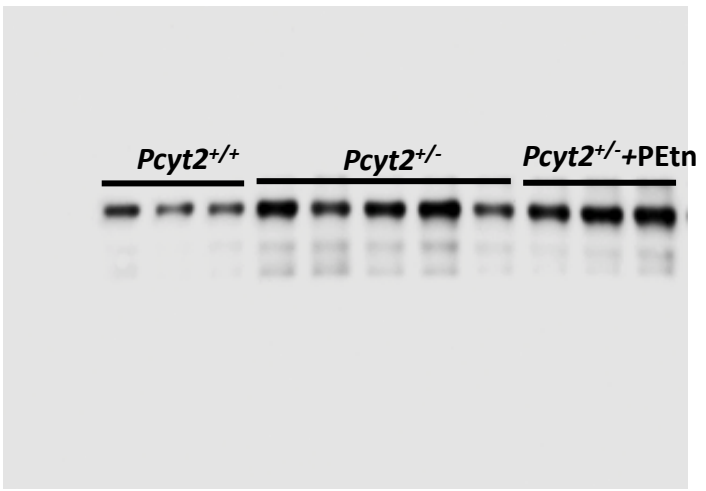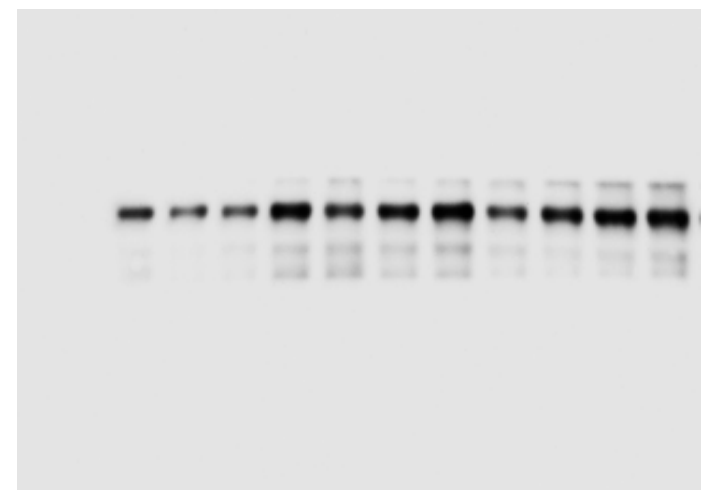

Gel 1

Gel 2

Nfkb,  
nuclear

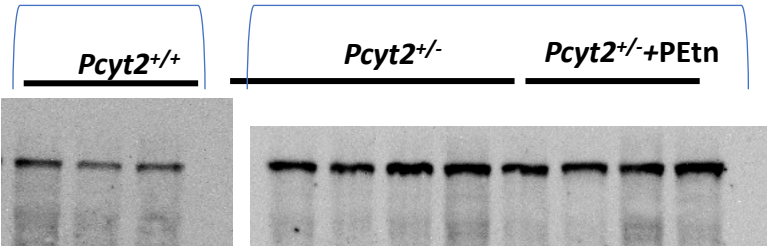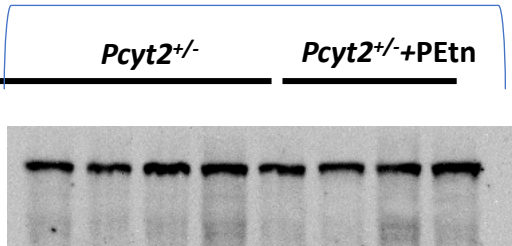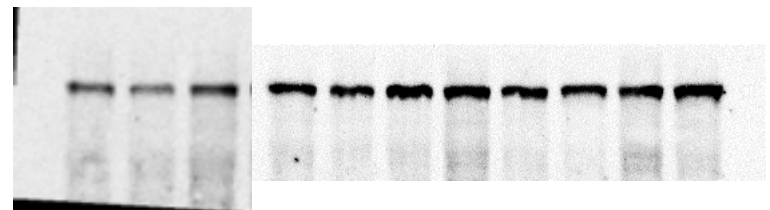

WB run on two separate mini-gels 1 and 2 but simultaneously; data are not used for quantifications

Figure 6C

Socs3, Stat3, and Stat3 nuclear membranes were cut prior to antibody hybridization

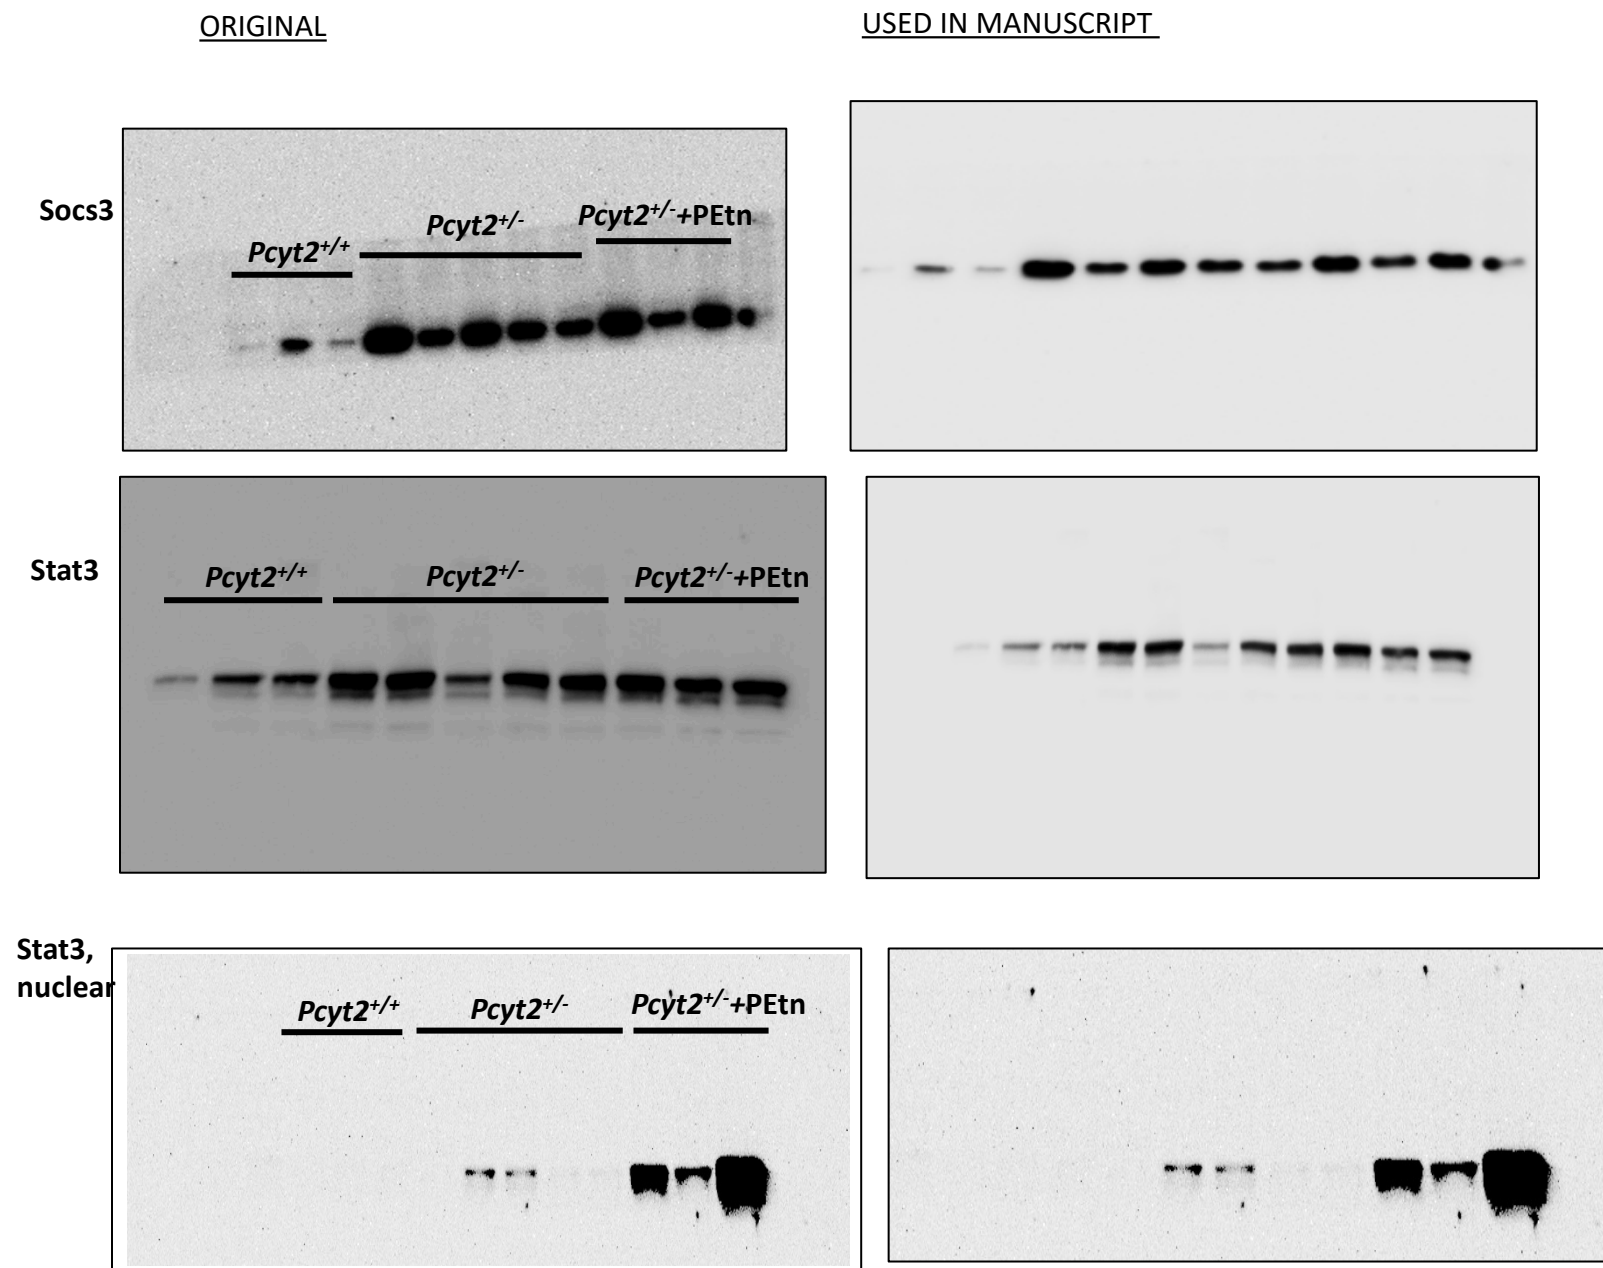



Figure 6C

$\beta$ -Tubulin membrane was cut prior to antibody hybridization

ORIGINAL

USED IN MANUSCRIPT

$\beta$ -Tubulin

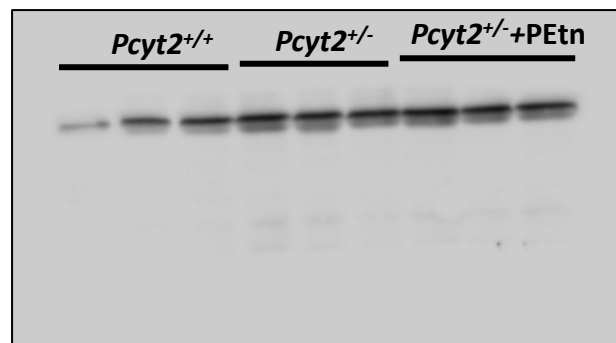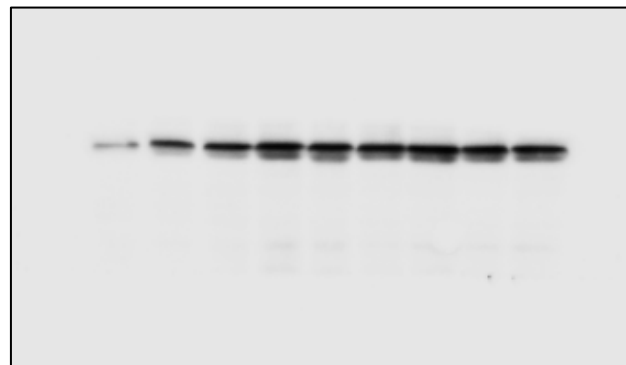



Figure 6D

p-Eif2 $\alpha$ , Eif2 $\alpha$  and  $\beta$ -Actin membrane were cut prior to antibody hybridization

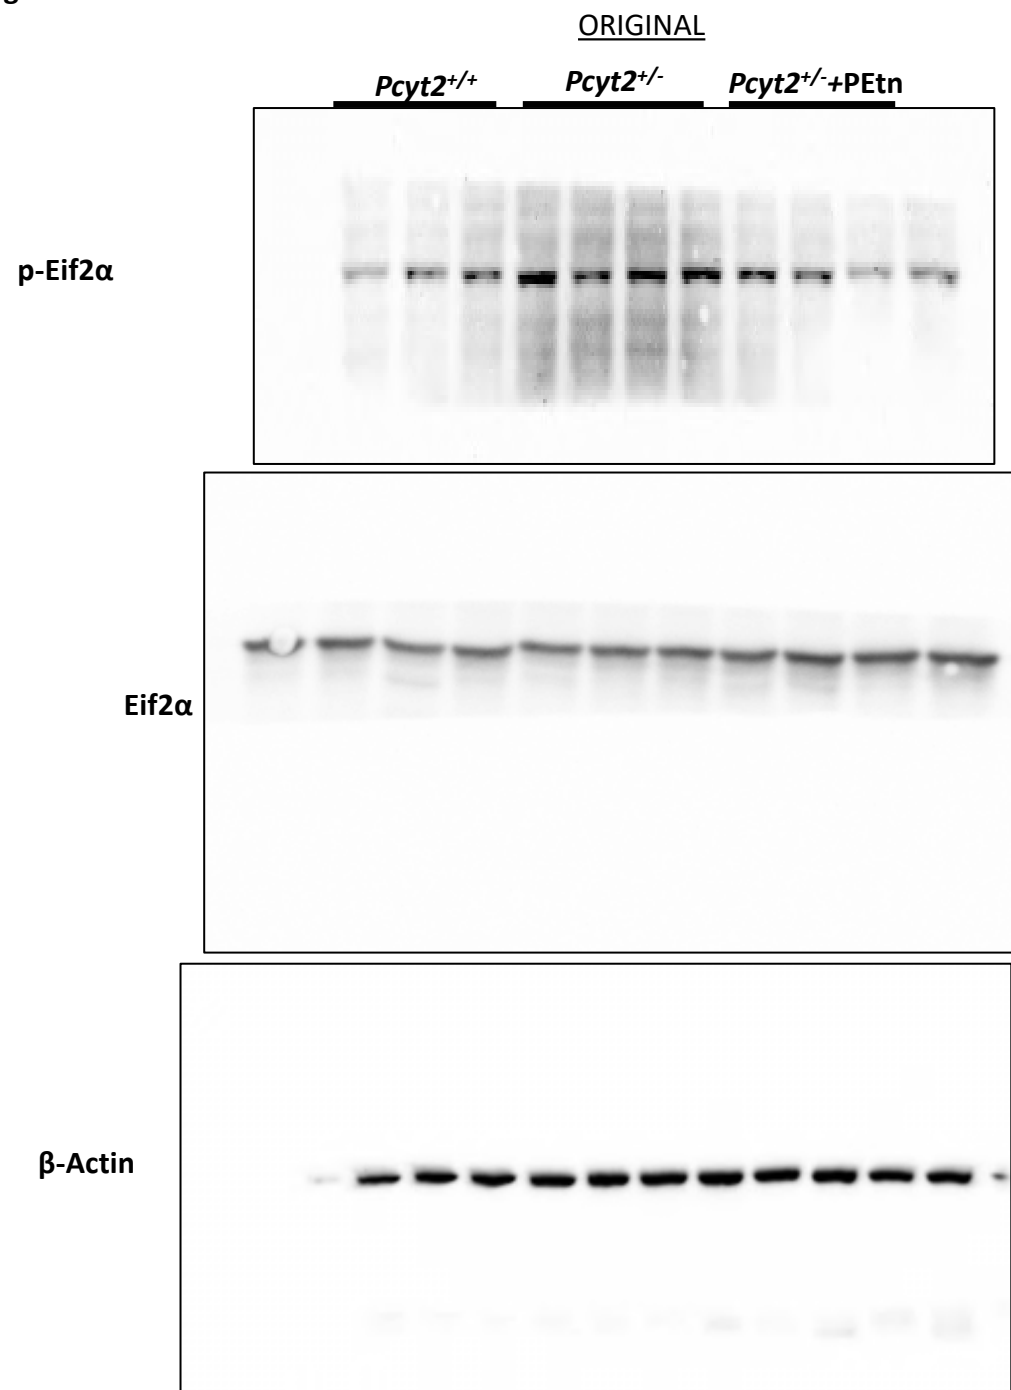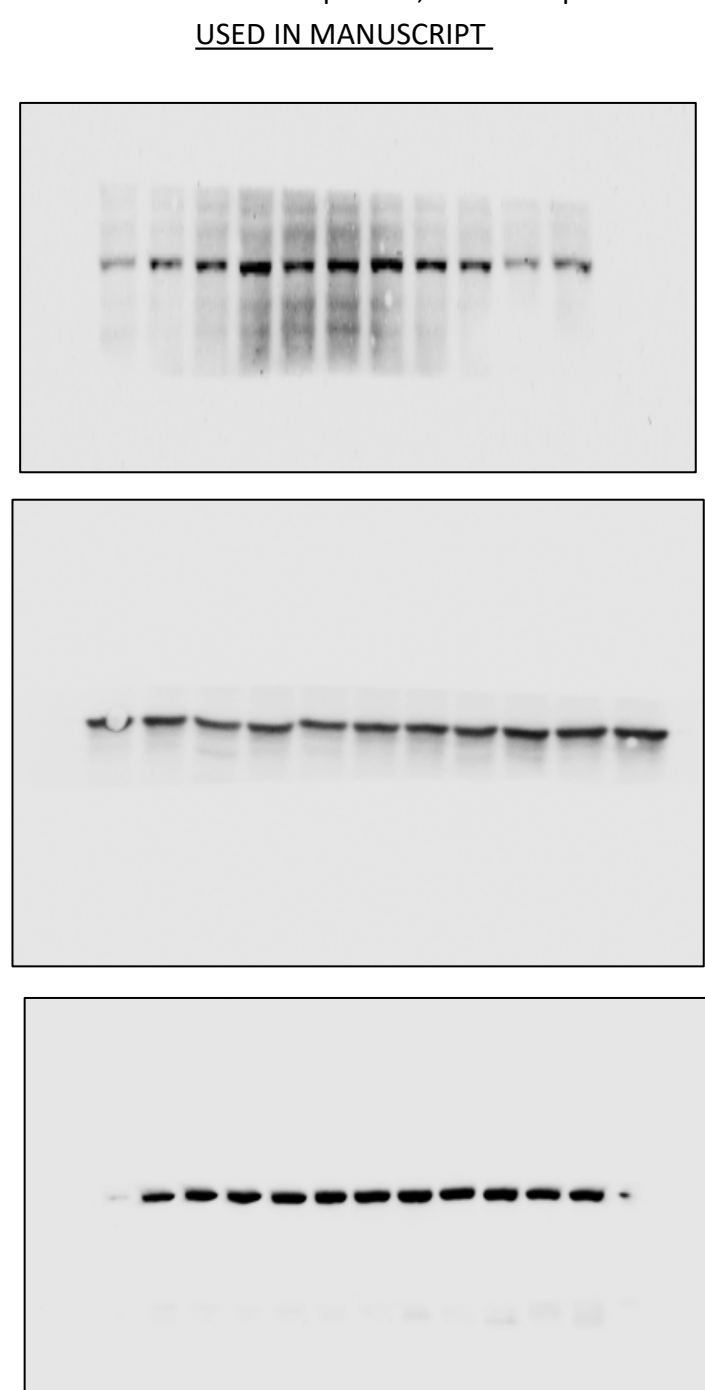

**Figure 6E**

p-Erk1/2, Erk1/2 and p-Jnk1/2 membranes were cut prior to antibody hybridization

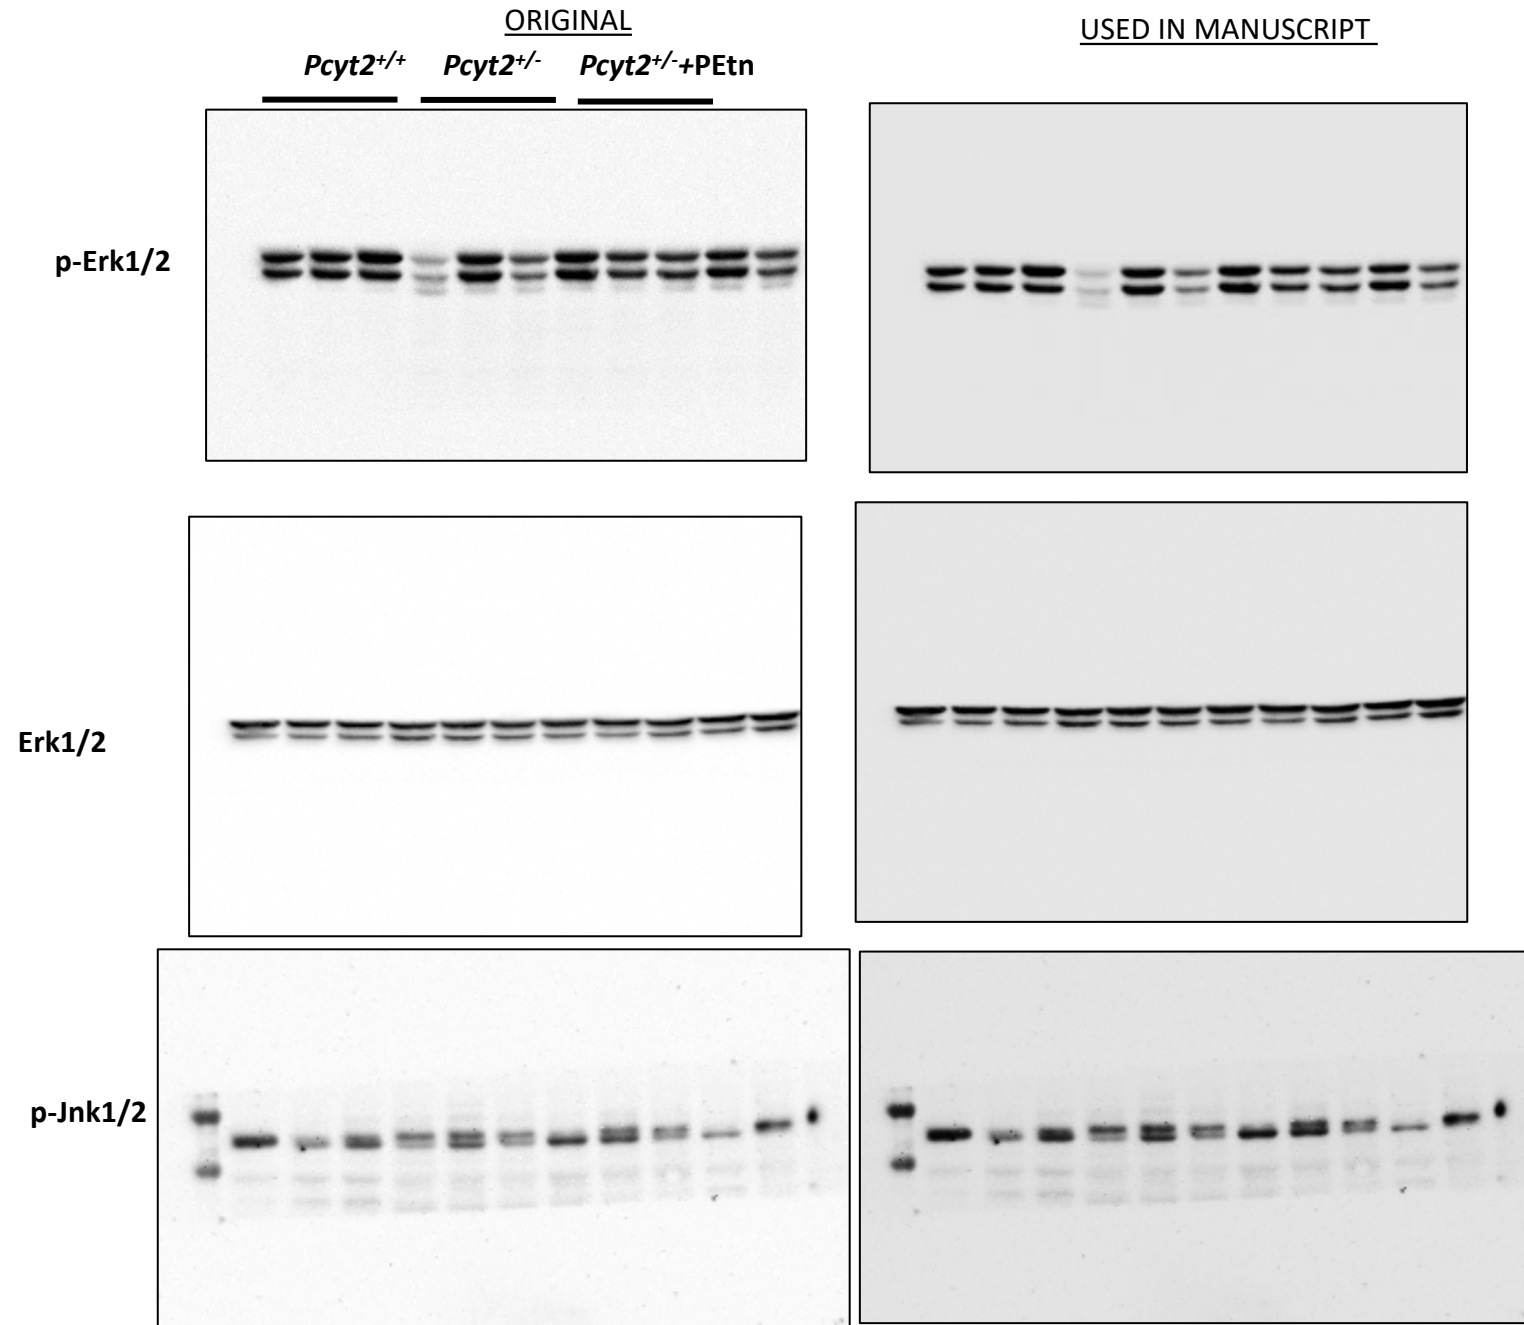



Jnk1/2, p-p38 and p38 membranes were cut prior to antibody hybridization

Figure 6E

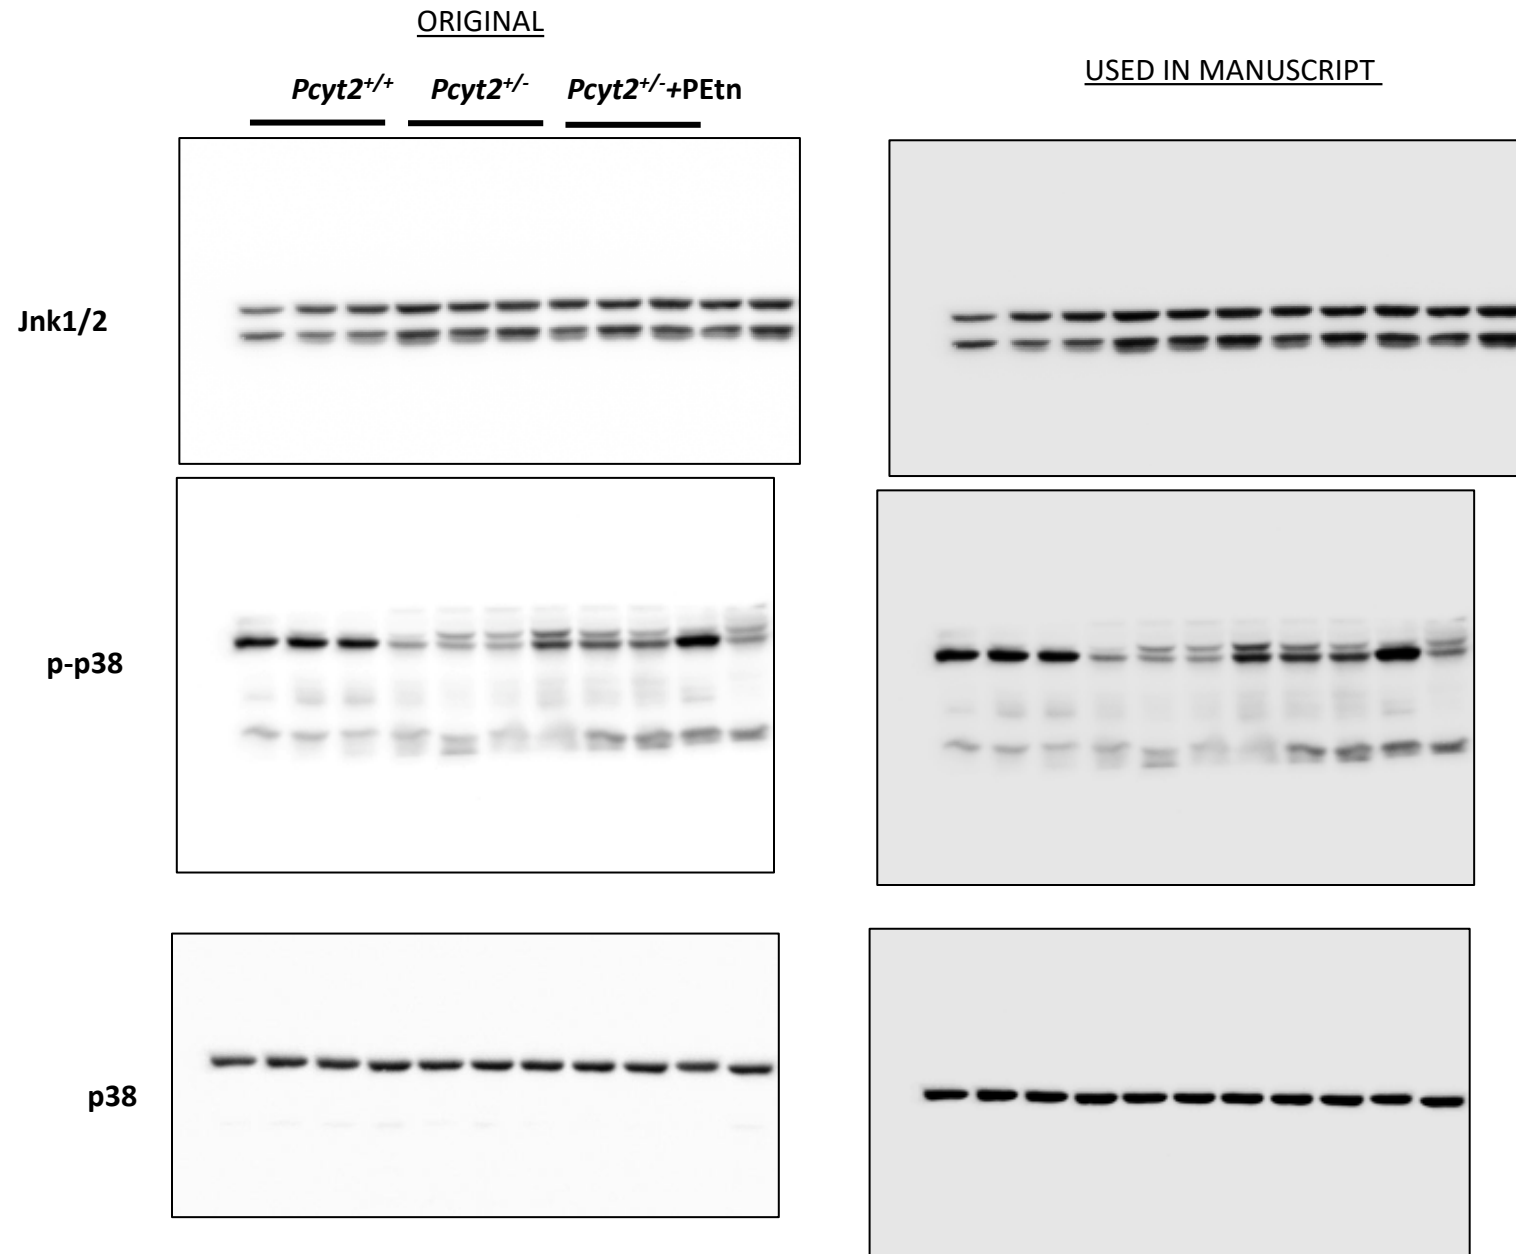

Supplement: 41598_2022_5140_MOESM1_ESM.pdf [file 41598_2022_5140_MOESM1_ESM.pdf]
