# Supplementary material for: Pcyt2 deficiency causes age-dependant development of nonalcoholic steatohepatitis and insulin resistance that could be attenuated with phosphonoethylamine
Source: PubMed Central journal article supplement (PMC8776951; doi:10.1038/s41598-022-05140-y), 2022-01-20
Supplement: 41598_2022_5140_MOESM2_ESM.pdf [file 41598_2022_5140_MOESM2_ESM.pdf]

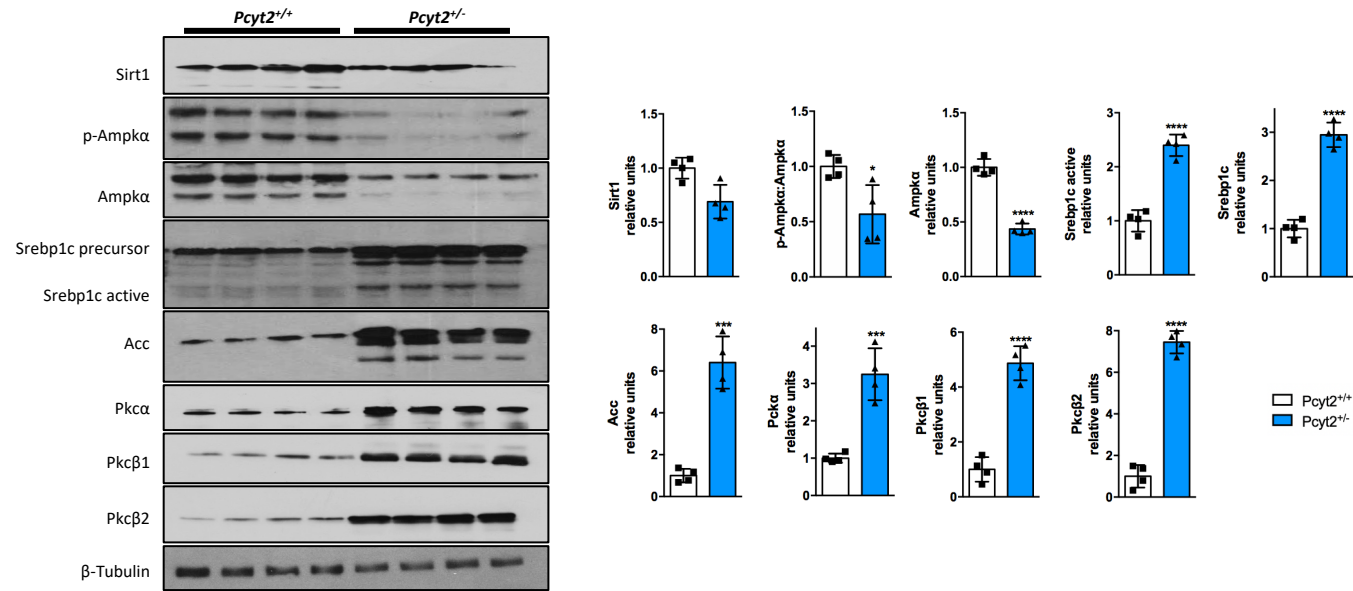

Supplementary Figure 1: Mitochondria regulators are inhibited and lipid/lipogenic pathways are dramatically upregulated in fasted 6-mo *Pcyt2*<sup>-/-</sup>. Immunoblot analysis of lipid pathways in fasted *Pcyt2*<sup>+/+</sup> and *Pcyt2*<sup>-/-</sup> (n=4). Data are presented as mean ± SD. \**p*<0.05, \*\**p*<0.01, \*\*\**p*<0.001, \*\*\*\**p*<0.0001.

**Supplementary table 1.** Primer Sequences and melting temperatures (T<sub>m</sub>) for polymerase chain reaction (PCR) using mouse hepatic RNA.

| Gene          | Primer Forward 5'-3'  | Primer Reverse 5'-3'    | T <sub>m</sub> (°C) |
|---------------|-----------------------|-------------------------|---------------------|
| TGH           | GCTGGGTCCAGGACAACATT  | GCGCAGGCAATGAACCATAA    | 59                  |
| LPL           | GCTCGCACGAGCGCTCCATT  | CCTCGGGCAGGGTGAAGGGAA   | 59                  |
| ATGL          | CAACGCCACTCACATCTACGG | GGACACCTCAATAATGTTGGCAC | 57                  |
| PPAR $\alpha$ | GCTCACAGAATTTGCCAAGG  | GTCATCCAGTTCTAAGGCATTG  | 57                  |
| PPAR $\gamma$ | CAGAAGTGCCTTGCTGTGGGG | CTTGGCTTTGGTCAGCGGG     | 57                  |
| CTL-1         | GAACGCTCTGCGAGTGGCTGC | CGGCTTTAGCTCTCGGGCGT    | 49                  |
| PCYT1         | ATGCACAGAGTTCAGCTAAAG | GGGCTTACTAAAGTCAACTTCAA | 50                  |
| PSS1          | CTGTTGTGCAATGGTGGTGG  | GGCTGGCTTGGAACACAAAG    | 59.5                |
| PSS2          | GAGTGGCTGTCCCTGAAGAC  | TCGTAGATCTCACGCATGGC    | 59                  |
| PSD           | GTTTGCTGTCACGTGCCTGTG | CAGTGCAAGCCACATACGGG    | 59.5                |
| PEMT          | TGTTTGTGCTGTCCAGCTTC  | TTCCAAAGATCCTTCATGGC    | 52                  |
| BHMT          | TGGATTGGAACCCCGAGTTG  | GGTGTGCATGTCCAAACCAC    | 59                  |
| TNF $\alpha$  | ACAGAAAGCATGATCCGCGA  | GCTACAGGCTTGTCACCTCGAA  | 56                  |
| TNFR          | AAAGGGCACCTTTACGGCTT  | GTGACATTTGCAAGCGGAGG    | 56                  |
| IL-10         | TCTTGCACTACCAAAGCCACA | TTGGCAACCCAAGTTAACCCT   | 57                  |
| IL-6          | GCCTTCTTGGGACTGATGCT  | TGGAAATTGGGGTAGGAAGGAC  | 56                  |
| TGF $\beta$ 1 | AGGAGACGGAATACAGGGCT  | CCACGTAGTAGACGATGGGC    | 57                  |
| TGF $\beta$ 3 | ATGACCCACGTCCCCTATCA  | ACTCTGCCCGGAACAGATTG    | 57                  |
| IFNY          | CGGCACAGTCATTGAAAGCC  | TGCATCCTTTTTTCGCCTTGC   | 57                  |
| GAPDH         | ACCACAGTCCATGCCATCAC  | TCCACCACCCTGTTGCTGTA    | 58                  |

**Abbreviations:** ACC-acetyl-CoA carboxylase, Akt-protein kinase B, AMPK-AMP-activated protein kinase, ANGPTL4-angiopoietin-like 4, ANOVA-analysis of variance, ATGL-adipose triglyceride lipase, ATP-adenosine triphosphate, AUC-area under the curve, BCA-bicinchoninic acid, BMI-body mass index, BSA-bovine serum albumin, CD68- cluster of differentiation 68, CDP-cytidine diphosphate, CMP-cytidine monophosphate, COX-2-cyclooxygenase-2, CTL-1-choline transporter-like protein 1, CTP-cytidine triphosphate, DAG-diacylglycerol, EGR1-early growth response protein 1, EIF2 $\alpha$ - Eukaryotic Initiation Factor 2 alpha, EK-ethanolamine kinase, EPT-CDP-ethanolamine:1,2-diacylglycerol ethanolamine-phosphotransferase, ERK- Extracellular signal-regulated kinase, ET/Pcyt2-CTP-phosphoethanolamine cytidyltransferase, ETKO- CTP-phosphoethanolamine cytidyltransferase knock out, Etn-ethanolamine, FA-fatty acid, FBS-fetal bovine serum, FOXO1- Forkhead Box O1, G6Pase-glucose 6-phosphate, G6PDH-glucose 6-phosphate dehydrogenase, GAPDH- glyceraldehyde 3-phosphate dehydrogenase, GK-glucokinase, GTT-glucose tolerance test, H&E-hematoxylin and eosin, HK-hexokinase, INF $\gamma$ -interferon gamma, IR-insulin receptor, IRS1-insulin receptor substrate 1, JNK- c-Jun N-terminal kinases, Keap1-kelch-like ECH-associated protein 1, L-Pk-liver pyruvate kinase, LSC- liquid scintillation counting, LXR-liver X receptor, MAM-ER mitochondria associated membranes, MAPK- Mitogen-activated protein kinase, mRNA-messenger ribonucleic acid, mTORC1/2-mammalian target of rapamycin complex 1/2, NAD-nicotinamide adenine dinucleotide, NADPH/NADP<sup>+</sup>-nicotinamide adenine dinucleotide phosphate, NAFLD-non-alcoholic fatty liver disease, NASH-nonalcoholic steatohepatitis, NF- $\kappa$ B-nuclear factor kappa-light-chain-enhancer of activated B cells, NIH- National Institutes of Health, Nrf2-nuclear factor erythroid 2-related factor 2, PAS-periodic acid-Schiff reagent, PC-phosphatidylcholine, PDK-phosphoinositide-dependent kinase-1, PE-phosphatidylethanolamine, PEMT-PE N-methyltransferase, PEPCK-phosphoenolpyruvate carboxykinase, PEtn-phosphoethanolamine, PGC1 $\alpha$ - Peroxisome proliferator activated receptor gamma coactivator 1 alpha, Pi-inorganic phosphate, PI3K-phosphoinositide 3-kinase, PKA- protein kinase A, PKC-protein kinase C, PPAR-peroxisome proliferator-activated receptor, PS-phosphatidylserine, PSD-phosphatidylserine decarboxylase,

**Supplementary Table 2 for Fig 2A. Downregulated pathways in 2-mo *Pcyt2*<sup>+/-</sup> liver**

**Figure 2A-a: MGI Mammalian Phenotype level 4, 2019**

| Term                                                                                                                 | Overlap<br>Combined Score    | P-value            | Adjusted P-value      | Old P-value         | Old Adjusted P-value                                                                                  | Odds Ratio          |
|----------------------------------------------------------------------------------------------------------------------|------------------------------|--------------------|-----------------------|---------------------|-------------------------------------------------------------------------------------------------------|---------------------|
| 1. MP:0002628 hepatic steatosis                                                                                      | 19/206<br>3.0408255347593585 | 29.84444911985981  | 5.464855551992962E-5  | 0.06394902276836688 | 0                                                                                                     | 0                   |
| ANK1;ELOVL5;NOS3;PEX11A;MAT1A;GNMT;HADHB;LGALS3;POR;PGRMC1;ACADL;ACX1;ACADM;ALDOB;APOB;PARGC1A;PNPLA2;SIDT2;SLC25A13 |                              |                    |                       |                     |                                                                                                       |                     |
| 2. MP:0005309 increased circulating ammonia level                                                                    | 5/14<br>0                    | 16.422018348623855 | 5.9793382672619803E-5 | 159.69781517242902  | OAT;CPS1;ARG1;ASL;ASS1                                                                                | 0.06394902276836688 |
| 3. MP:0011501 increased glomerular capsule space                                                                     | 5/20<br>0                    | 9.850152905198776  | 3.929038056401208E-4  | 77.2443646666549    | INVS;GLIS3;SCTR;GNE;UOX                                                                               | 0.23151917642846842 |
| 4. MP:0009355 increased liver triglyceride level                                                                     | 10/84<br>0                   | 4.011785282971724  | 4.3294843651887503E-4 | 31.070843428097586  | GYS2;FADS2;LGALS3;PGRMC1;PANK1;PEX11A;LPIN2;SIDT2;SLC25A13;PNPLA2                                     | 0.23151917642846842 |
| 5. MP:0009815 decreased prostaglandin level                                                                          | 4/13<br>0                    | 13.117557251908398 | 6.584952774437638E-4  | 96.09336361432368   | FADS2;NOS3;LPAR3;FADS1                                                                                | 0.28170427969044215 |
| 6. MP:0002118 abnormal lipid homeostasis                                                                             | 13/141<br>0                  | 3.0206196787925697 | 7.970780246633689E-4  | 21.550786252056398  | ARSA;PCYT2;CYP4A14;ADIPOR2;CYP7A1;HADHB;ACADL;EHHADH;ANGPTL4;SLC37A4;PPARGC1A;MFSD2A;PNPLA2           | 0.284158315792491   |
| 7. MP:0005584 abnormal enzyme/coenzyme activity                                                                      | 14/171<br>0.4962944438385961 | 0                  | 0.001624151990121633  | 2.6522095492025874  | GKD;PANK1;GPT2;KMO;KLF15;ASS1;SLK;ACADL;CES1E;TMBIM1;ME1;ASL;LPIN2;PNPLA2                             | 17.03453047198098   |
| 8. MP:0000598 abnormal liver morphology                                                                              | 17/233<br>0                  | 2.344561266874351  | 0.001924728975720663  | 14.660471529834393  | INVS;ONECUT2;ARG1;EPO;UNC93B1;NOS3;ASPSCR1;MAT1A;CYP7A1;CRKL;GNMT;LGALS3;ACOX1;CTH;ALDOB;MFSD2A;SIDT2 | 0.5146244098833123  |
| 9. MP:0005311 abnormal circulating amino acid level                                                                  | 6/43<br>0.6416566712394823   | 0                  | 0.0026998176910497155 | 4.793841314515127   | OAT;ARG1;CTH;ASL;KLF15;ASS1                                                                           | 28.353514961655737  |
| 10. MP:0000609 abnormal liver physiology                                                                             | 10/110<br>0                  | 2.9647149460708784 | 0.003436208878611819  | 16.819973708379674  | AS3MT;EPO;PANK1;ELOVL5;ACOX1;NOS3;MAT1A;PPARGC1A;CYP7A1;RAD18                                         | 0.7223244186275055  |

**Figure 2b: GO Biological Process 2018**

|                                                              |                                 |                      |                       |                    |                   |                                                                                                                 |
|--------------------------------------------------------------|---------------------------------|----------------------|-----------------------|--------------------|-------------------|-----------------------------------------------------------------------------------------------------------------|
| 1. fatty acid metabolic process (GO:0006631)                 | 15/106<br>0                     | 2.017310155131874E-6 | 0.0029175606462129217 | 4.927138079311993  | 64.6132350140058  | CPT1A;ABCD3;ACSM3;GPX4;ELOVL4;ACSL1;PLA2G1B;ADIPOR2;ACOX1;FASN;PCCB;ACOT1;ACADM;PPARGC1A;LPIN2                  |
| 2. organonitrogen compound biosynthetic process (GO:1901566) | 20/181<br>0.0029175606462129217 | 0                    | 2.3576247646165025E-6 | 3.7286521058719466 | 48.31533669439376 | OAT;GOT1;ELOVL4;ELOVL5;ARG1;GSTO1;GPT2;ASNS;FURIN;GPHN;ASS1;ALDH3A2;GLUD1;CPS1;VAPA;VAPB;ASL;CEPT1;LPIN2;MFSD2A |

3. fatty acid oxidation (GO:0019395) 10/50 4.397605834839108E-6 0.003628024813742264 0  
0 7.434899845916795 91.70540258718638  
HADHB;ALDH3A2;ABCD3;ACADL;ACOX1;EHHADH;ACADM;ACAD11;ADIPOR2;PPARGC1A

4. fatty acid beta-oxidation (GO:0006635) 9/50 3.2408985307256655E-5 0.019556789706896935 0  
0 6.51782363977486 67.37523081898888  
HADHB;ABCD3;ACADL;ACOX1;EHHADH;ACADM;ACAD11;DECR2;CRAT

5. alpha-linolenic acid metabolic process (GO:0036109) 5/13 3.950866607453926E-5  
0.019556789706896935 0 0 18.47572629969419 187.3252137256421  
FADS2;ELOVL5;ACSL1;ACOX1;FADS1

6. regulation of primary metabolic process (GO:0080090) 15/139 5.5823126258719955E-5  
0.023027039581721982 0 0 3.6096849328791825 35.35080804066797  
CPT1A;PSMD12;ACSL1;PSMD13;PEX11A;CYP7A1;GLIPR1;PSMB4;ACOX1;CARM1;ME1;HMGCS2;ACADM;ANGPTL  
4;FADS1

7. regulation of lipid metabolic process (GO:0019216) 12/100 1.1019524030597333E-4  
0.038961888536754856 0 0 4.057819305887312 36.97994960002394  
CPT1A;GLIPR1;ACSL1;ACOX1;PEX11A;CARM1;ME1;HMGCS2;ACADM;ANGPTL4;CYP7A1;FADS1

8. fatty acid catabolic process (GO:0009062) 9/65 2.6656374259770733E-4 0.07207968712770826  
0 0 4.7682692307692305 39.24236539435219  
HADHB;ALDH3A2;ABCD3;ACADL;EHHADH;PCCB;ACADM;ACAD11;LPIN2

9. carnitine metabolic process (GO:0009437) 4/11 3.203541650120367E-4 0.07207968712770826  
0 0 16.867175572519084 135.71470152266448 CPT1A;ACADL;ACADM;CRAT

10. urea cycle (GO:0000050) 4/11 3.203541650120367E-4 0.07207968712770826 0 0  
16.867175572519084 135.71470152266448 CPS1;ARG1;ASL;ASS1

11. arginine metabolic process (GO:0006525) 4/11 3.203541650120367E-4 0.07207968712770826  
0 0 16.867175572519084 135.71470152266448 CPS1;NOS3;ARG1;ASS1

12. phosphatidylethanolamine metabolic process (GO:0046337) 5/20 3.929038056401208E-4  
0.078613615737343850 0 9.850152905198776 77.2443646666549  
PCYT2;ETNK2;HRASLS5;CEPT1;LPIN2

13. long-chain fatty acid metabolic process (GO:0001676) 8/55 4.129200018527152E-4  
0.078613615737343850 0 5.044677582769553 39.30942261235577  
FADS2;CPT1A;ACADL;ACSL1;ELOVL5;ACOX1;ACOT1;FADS1

14. mitochondrial transport (GO:0006839) 13/135 5.277643310456708E-4 0.09330119423843108 0  
0 3.170164441963153 23.924789492261766  
PNPT1;BAD;TIMM9;BNIP3;AIP;ATP5C1;ATP5G3;ATP5L;PINK1;GRPEL1;SLC25A20;SLC25A22;SLC25A13  
ELOVL5;ACOX1;ACOT1

**Supplementary Table 3 for Figure 2B. Upregulated pathways in 2-mo *Pcyt2*<sup>-/-</sup> liver**

| Term | Overlap<br>Combined Score | P-value<br>Genes | Adjusted P-value | Old P-value | Old Adjusted P-value | Odds | Ratio |
|------|---------------------------|------------------|------------------|-------------|----------------------|------|-------|
|------|---------------------------|------------------|------------------|-------------|----------------------|------|-------|

**Elsevier Pathway Collection**

|     |                                                   |                    |                      |                            |                             |  |  |
|-----|---------------------------------------------------|--------------------|----------------------|----------------------------|-----------------------------|--|--|
| 1.  | <b>AngiopietinR -&gt; STAT Signaling</b>          | 3/8                | 6.695238747960458E-4 | 0.30440483811407787        | 0                           |  |  |
|     | 0                                                 | 24.976119402985073 | 182.54905138092414   | <b>ANGPT4;ANGPT2;LCK</b>   |                             |  |  |
| 2.  | <b>AngiopietinR -&gt; FOXO Signaling</b>          | 3/9                | 9.86725569251468E-4  | 0.30440483811407787        | 0                           |  |  |
|     | 0                                                 | 20.812366737739872 | 144.04485859125822   | <b>ANGPT4;ANGPT2;FOXO1</b> |                             |  |  |
| 3.  | GUCY2C in Intestinal Ion and Fluid Homeostasis    | 3/12               | 0.002451382720992579 |                            |                             |  |  |
|     | 0.504167712950807                                 | 0                  | 0                    | 13.872778962331202         | 83.39070376195338           |  |  |
|     | SLC9A3;GUCA2B;GUCA2A                              |                    |                      |                            |                             |  |  |
| 4.  | Genes with Mutations Associated with Urolithiasis | 2/6                | 0.007828126089712499 |                            |                             |  |  |
|     | 0.8517865161452929                                | 0                  | 0                    | 20.770212765957446         | 100.73619909675153          |  |  |
|     | CASR;SLC34A1                                      |                    |                      |                            |                             |  |  |
| 5.  | <b>IGF1R -&gt; CEBPA/FOXO1A Signaling</b>         | 2/9                | 0.017926636569026717 | 0.8517865161452929         | 0                           |  |  |
|     | 0                                                 | 11.866869300911855 | 47.72223035652416    | <b>IGF2;FOXO1</b>          |                             |  |  |
| 6.  | Dioxin Role in Endometriosis                      | 2/11               | 0.0265489417774117   | 0.8517865161452929         | 0                           |  |  |
|     | 0                                                 | 9.228841607565013  | 33.489301013599345   | <b>ARNT;CYP1B1</b>         |                             |  |  |
| 7.  | Glioblastoma, Proneural Subtype                   | 2/11               | 0.0265489417774117   | 0.8517865161452929         | 0                           |  |  |
|     | 0                                                 | 9.228841607565013  | 33.489301013599345   | <b>SOX2;TCF4</b>           |                             |  |  |
| 8.  | Hematopoietic Cell Lineage: B-cell (mouse)        | 4/49               | 0.028152708219656288 | 0.8517865161452929         |                             |  |  |
|     | 0                                                 | 0                  | 3.700474833808167    | 13.211108582205329         | <b>ANGPT2;EBF1;ID3;DNMT</b> |  |  |
| 9.  | <b>Endocannabinoids Role in Sleep Regulation</b>  | 2/12               | 0.031368464329064434 | 0.8517865161452929         |                             |  |  |
|     | 0                                                 | 0                  | 8.305531914893617    | 28.753354580170335         | <b>NAPEPLD;DAGLB</b>        |  |  |
| 10. | Dioxin Induced Chloracne (Hypothesis)             | 2/12               | 0.031368464329064434 | 0.8517865161452929         |                             |  |  |
|     | 0                                                 | 0                  | 8.305531914893617    | 28.753354580170335         | <b>EPGN;ARNT</b>            |  |  |

**BioPlanet 2019**

|    |                                                                                                   |                    |                      |                          |                   |   |                    |
|----|---------------------------------------------------------------------------------------------------|--------------------|----------------------|--------------------------|-------------------|---|--------------------|
| 1. | Proepithelin conversion to epithelin <b>and wound repair control</b>                              | 2/8                | 0.014162203067316765 |                          |                   |   |                    |
|    | 0.9300147537850102                                                                                | 0                  | 0                    | 13.845390070921987       | 58.94229858120675 |   |                    |
|    | CELA3B;CELA1                                                                                      |                    |                      |                          |                   |   |                    |
| 2. | <b>Binding of RNA by insulin-like growth factor 2 mRNA binding proteins (IGF2BPs/IMPs/VICKZs)</b> | 2/8                | 0.014162203067316765 | 0.9300147537850102       | 0                 | 0 | 13.845390070921987 |
|    | 58.94229858120675                                                                                 |                    |                      | IGF2;ACTB                |                   |   |                    |
| 3. | <b>Activation of pro-caspase 8</b>                                                                | 2/9                | 0.017926636569026717 | 0.9300147537850102       | 0                 |   |                    |
|    | 0                                                                                                 | 11.866869300911855 | 47.72223035652416    | <b>CASP8;TNFSF10</b>     |                   |   |                    |
| 4. | <b>Transport of inorganic cations/anions and amino acids/oligopeptides</b>                        | 6/95               | 0.02500765895155889  |                          |                   |   |                    |
|    | 0.9300147537850102                                                                                | 0                  | 0                    | 2.812219703910884        | 10.37307807197569 |   |                    |
|    | <b>SLC9A3;SLC6A19;SLC7A8;SLC34A1;SLC7A11;SLC12A6</b>                                              |                    |                      |                          |                   |   |                    |
| 5. | <b>Glutathione biosynthesis and recycling</b>                                                     | 2/11               | 0.0265489417774117   | 0.9300147537850102       |                   |   |                    |
|    | 0                                                                                                 | 0                  | 9.228841607565013    | 33.489301013599345       | <b>GCLC;CNDP2</b> |   |                    |
| 6. | <b>G-protein activation</b>                                                                       | 3/28               | 0.02763591893096248  | 0.9300147537850102       | 0                 | 0 |                    |
|    | 4.990106609808103                                                                                 |                    | 17.90769090377881    | <b>GNAZ;GNB4;GNG12</b>   |                   |   |                    |
| 7. | <b>Homologous recombination</b>                                                                   | 3/29               | 0.030298923376566384 | 0.9300147537850102       | 0                 |   |                    |
|    | 0                                                                                                 | 4.797933409873709  | 16.776660748174137   | <b>POLD3;TOP3B;XRCC3</b> |                   |   |                    |

8. **Myometrial relaxation and contraction pathways** 8/155 0.03098226588517045  
0.9300147537850102 0 0 2.2731644381890685 7.897746830699842  
GUCY1A3;RGS2;PKIA;GNB4;GUCA2B;GNG12;ACTB;GUCA2A
9. **SODD/TNFR1 signaling pathway** 2/12 0.031368464329064434 0.9300147537850102 0  
0 8.305531914893617 28.753354580170335 CASP8;MADD
10. **Amino acid transport across the plasma membrane** 3/31 0.0360143368120434  
0.9300147537850102 0 0 4.454766981419433 14.806924553684793  
**SLC6A19;SLC7A8;SLC7A11**

#### Reactome 2016

1. **TRAIL signaling** Homo sapiens R-HSA-75158 2/7 0.010789024695074069  
0.9999952869426106 0 0 16.61531914893617 75.25453371818327  
CASP8;TNFSF10
2. **Insulin-like Growth Factor-2 mRNA Binding Proteins (IGF2BPs/IMPs/VICKZs) bind RNA** Homo sapiens R-  
HSA-428359 2/8 0.014162203067316765 0.9999952869426106 0 0  
13.845390070921987 58.94229858120675 IGF2;ACTB
3. **Thromboxane signaling through TP receptor** Homo sapiens R-HSA-428930 3/23  
0.016287439904619384 0.9999952869426106 0 0 6.239232409381663  
25.689172355795996 **TBXA2R;GNB4;GNG12**
4. **CASP8 activity is inhibited** Homo sapiens R-HSA-5218900 2/11 0.0265489417774117  
0.9999952869426106 0 0 9.228841607565013 33.489301013599345  
**CASP8;TNFSF10**
5. **Regulation by c-FLIP** Homo sapiens R-HSA-3371378 2/11 0.0265489417774117  
0.9999952869426106 0 0 9.228841607565013 33.489301013599345  
CASP8;TNFSF10
6. **Dimerization of procaspase-8** Homo sapiens R-HSA-69416 2/11 0.0265489417774117  
0.9999952869426106 0 0 9.228841607565013 33.489301013599345  
CASP8;TNFSF10
7. **G-protein activation** Homo sapiens R-HSA-202040 3/28 0.02763591893096248  
0.9999952869426106 0 0 4.990106609808103 17.90769090377881  
**GNAZ;GNB4;GNG12**
8. **Transport of inorganic cations/anions and amino acids/oligopeptides** Homo sapiens R-HSA-425393  
6/99 0.029844089887825203 0.9999952869426106 0 0 2.69071023120587  
9.449151304645508 **SLC9A3;SLC6A19;SLC7A8;SLC34A1;SLC7A11;SLC12A6**
9. **mRNA 3'-end processing** Homo sapiens R-HSA-72187 4/51 0.03201949066091937  
0.9999952869426106 0 0 3.5426441171122023 12.191692586029836  
FYTTD1;FIP1L1;CPSF3;SRSF11
10. **Post-Elongation Processing of Intron-Containing pre-mRNA** Homo sapiens R-HSA-112296 4/51  
0.03201949066091937 0.9999952869426106 0 0 3.5426441171122023  
12.191692586029836 FYTTD1;FIP1L1;CPSF3;SRSF11,CASP8;TNFSF10

#### GO Biological Processes 2018

1. **negative regulation of blood vessel endothelial cell migration (GO:0043537)** 5/31  
7.333995806897917E-4 0.9359433242991512 0 0 8.030802174271125  
57.96488353811351 **ANGPT4;ANGPT2;TBXA2R;MMRN2;MEOX2**
2. **negative regulation of cell migration involved in sprouting angiogenesis (GO:0090051)** 3/14  
0.003916065051671796 0.9359433242991512 0 0 11.34929249854623  
62.905359703868335 **TBXA2R;MMRN2; MEOX2**

|     |                                                                                         |                    |                      |                    |                              |  |  |
|-----|-----------------------------------------------------------------------------------------|--------------------|----------------------|--------------------|------------------------------|--|--|
| 3.  | membrane lipid catabolic process (GO:0046466)                                           | 2/8                | 0.014162203067316765 |                    |                              |  |  |
|     | 0.9359433242991512                                                                      | 0                  | 0                    | 13.845390070921987 | 58.94229858120675            |  |  |
|     | PPT1;CYP1B1                                                                             |                    |                      |                    |                              |  |  |
| 4.  | <b>negative regulation of protein polymerization</b> (GO:0032272)                       | 3/22               | 0.014410698981294951 |                    |                              |  |  |
|     | 0.9359433242991512                                                                      | 0                  | 0                    | 6.567949725058916  | 27.846690544326467           |  |  |
|     | DYRK1A;HIP1R;PFN2                                                                       |                    |                      |                    |                              |  |  |
| 5.  | <b>negative regulation of sprouting angiogenesis</b> (GO:1903671)                       | 3/22               | 0.014410698981294951 |                    |                              |  |  |
|     | 0.9359433242991512                                                                      | 0                  | 0                    | 6.567949725058916  | 27.846690544326467           |  |  |
|     | TBXA2R;MMRN2;MEOX2                                                                      |                    |                      |                    |                              |  |  |
| 6.  | regulation of <b>epidermal growth factor-activated receptor activity</b> (GO:0007176)   | 3/24               |                      |                    |                              |  |  |
|     | 0.01829466228131285                                                                     | 0.9359433242991512 | 0                    | 0                  | 5.9418215047212914           |  |  |
|     | 23.77409499159111 EPGN;NCK2;EREG                                                        |                    |                      |                    |                              |  |  |
| 7.  | RNA catabolic process (GO:0006401)                                                      | 4/43               | 0.01829529208018193  | 0.9359433242991512 |                              |  |  |
|     | 0                                                                                       | 0                  | 4.271093578785886    | 17.089121702331116 | RNASEH2B;DIS3L;RNASE6;HSPA1A |  |  |
| 8.  | positive regulation of nuclear division (GO:0051785)                                    | 3/25               | 0.020432949995376072 |                    |                              |  |  |
|     | 0.9359433242991512                                                                      | 0                  | 0                    | 5.671447955030045  | 22.065372194915977           |  |  |
|     | EPGN;IGF2;EREG                                                                          |                    |                      |                    |                              |  |  |
| 9.  | positive regulation of epidermal growth factor-activated receptor activity (GO:0045741) | 2/10               |                      |                    |                              |  |  |
|     | 0.022062059633939514                                                                    | 0.9359433242991512 | 0                    | 0                  | 10.382978723404255           |  |  |
|     | 39.59960002889824 EPGN;EREG                                                             |                    |                      |                    |                              |  |  |
| 10. | negative regulation of cardiac muscle hypertrophy (GO:0010614)                          | 2/11               | 0.0265489417774117   |                    |                              |  |  |
|     | 0.9359433242991512                                                                      | 0                  | 0                    | 9.228841607565013  | 33.489301013599345           |  |  |
|     | <b>RGS2;FOXO1</b>                                                                       |                    |                      |                    |                              |  |  |

#### GO Human phenotype

|     |                                                         |                    |                       |                      |                      |   |  |
|-----|---------------------------------------------------------|--------------------|-----------------------|----------------------|----------------------|---|--|
| 1.  | Narrow forehead (HP:0000341)                            | 5/65               | 0.018581530379705388  | 0.811679484707992    | 0                    |   |  |
|     | 0                                                       | 3.4739471805852964 | 13.845719353687516    |                      |                      |   |  |
|     | CSPP1;NPHP1;DYRK1A;TCF4;SLC12A6                         |                    |                       |                      |                      |   |  |
| 2.  | <b>Hypoalphalipoproteinemia</b> (HP:0003233)            | 2/10               | 0.022062059633939514  | 0.811679484707992    |                      |   |  |
|     | 0                                                       | 0                  | 10.382978723404255    | 39.59960002889824    | <b>ALMS1;PPP1R3A</b> |   |  |
| 3.  | Asthma (HP:0002099)                                     | 4/51               | 0.03201949066091937   | 0.811679484707992    | 0                    | 0 |  |
|     | 3.5426441171122023                                      | 12.191692586029836 | CASP8;CDSN;ALMS1;LIFR |                      |                      |   |  |
| 4.  | <b>Rhabdomyosarcoma</b> (HP:0002859)                    | 2/13               | 0.03650249782103007   | 0.811679484707992    | 0                    |   |  |
|     | 0                                                       | 7.550096711798839  | 24.99364828626234     | <b>PMS2;FOXO1</b>    |                      |   |  |
| 5.  | <b>Insulin-resistant diabetes mellitus</b> (HP:0000831) | 2/13               | 0.03650249782103007   |                      |                      |   |  |
|     | 0.811679484707992                                       | 0                  | 0                     | 7.550096711798839    | 24.99364828626234    |   |  |
|     | <b>ALMS1;PPP1R3A</b>                                    |                    |                       |                      |                      |   |  |
| 6.  | Polydipsia (HP:0001959)                                 | 2/14               | 0.04193358005675239   | 0.811679484707992    | 0                    | 0 |  |
|     | 6.920567375886525                                       | 21.94974443882456  | CASR;NPHP1            |                      |                      |   |  |
| 7.  | Abnormal drinking behavior (HP:0030082)                 | 2/14               | 0.04193358005675239   | 0.811679484707992    |                      |   |  |
|     | 0                                                       | 0                  | 6.920567375886525     | 21.94974443882456    | CASR;NPHP1           |   |  |
| 8.  | <b>Complement deficiency</b> (HP:0004431)               | 2/15               | 0.04764489483849146   | 0.811679484707992    |                      |   |  |
|     | 0                                                       | 0                  | 6.387888707037643     | 19.444604146539334   | CFH;C8A              |   |  |
| 9.  | <b>Maternal diabetes</b> (HP:0009800)                   | 2/15               | 0.04764489483849146   | 0.811679484707992    | 0                    |   |  |
|     | 0                                                       | 6.387888707037643  | 19.444604146539334    | <b>SOX2;PPP1R3A</b>  |                      |   |  |
| 10. | <b>Hyperuricemia</b> (HP:0002149)                       | 2/16               | 0.05362025129539057   | 0.811679484707992    | 0                    |   |  |
|     | 0                                                       | 5.931306990881459  | 17.353986796469474    | <b>ALMS1;PPP1R3A</b> |                      |   |  |





**Supplementary Table 4 for Fig. 3A Downregulated pathways in 6-mo *Pcvt2*<sup>-/-</sup> liver**

**Fig. 3A-a KEGG pathway Mouse**

| Term                           | Overlap<br>Combined Score  | P-value<br>Adjusted<br>Genes                                                                 | Old P-value        | Old Adjusted P-value   | Odds Ratio |
|--------------------------------|----------------------------|----------------------------------------------------------------------------------------------|--------------------|------------------------|------------|
| 1. Insulin signaling pathway   | 17/139<br>0                | 3.3542736653252626E-27<br>125.65685543964233                                                 | 7659.986902198042  | 5.36683786452042E-25   |            |
|                                |                            | INS1;PRKCI;MAP2K1;PKLR;BRAF;PIK3R2;SORBS1;CBL;GCK;PTPRF;HK2;ACACA;PIK3CA;SOS1;RAF1;FBP1;PCK2 |                    |                        |            |
| 2. Chronic myeloid leukemia    | 8/76<br>10                 | 1.6651543929129943E-12<br>75.49525616698293                                                  | 2047.5146387729324 | 1.3321235143303954E-10 |            |
|                                |                            | MAP2K1;PIK3CA;BRAF;PIK3R2;SOS1;RAF1;CBL;BCL2L1                                               |                    |                        |            |
| 3. FoxO signaling pathway      | 9/132<br>0                 | 3.2306236031537076E-12<br>48.385365853658534                                                 | 1280.1967477703968 | 1.523046855804862E-10  |            |
|                                |                            | INS1;MAP2K1;PIK3CA;BRAF;PIK3R2;SOS1;RAF1;IGF1R;PCK2                                          |                    |                        |            |
| 4. ErbB signaling pathway      | 8/84<br>0                  | 3.8076171395121555E-12<br>67.52122241086587                                                  | 1775.4042067411829 | 1.523046855804862E-10  |            |
|                                |                            | MAP2K1;PIK3CA;BRAF;PIK3R2;SOS1;RAF1;CBL;NCK1                                                 |                    |                        |            |
| 5. Prostate cancer             | 8/97<br>0                  | 1.2397993514637874E-11<br>57.62087712939471                                                  | 1447.0611181639738 | 3.4869852094777943E-10 | 0          |
|                                |                            | INS1;MAP2K1;PIK3CA;BRAF;PIK3R2;SOS1;RAF1;IGF1R                                               |                    |                        |            |
| 6. mTOR signaling pathway      | 9/154<br>10                | 1.3076194535541728E-11<br>40.99862068965517                                                  | 1027.4347719136917 | 3.4869852094777943E-10 |            |
|                                |                            | INS1;MAP2K1;PIK3CA;GRB10;BRAF;PIK3R2;SOS1;RAF1;IGF1R                                         |                    |                        |            |
| 7. Prolactin signaling pathway | 7/72<br>0                  | 8.15064064653917E-11<br>66.95769230769231                                                    | 1555.4499238974392 | 1.86300357635181E-9    | 0          |
|                                |                            | INS1;MAP2K1;PIK3CA;PIK3R2;SOS1;RAF1;GCK                                                      |                    |                        |            |
| 8. AMPK signaling pathway      | 8/126<br>9                 | 1.0351024557091974E-10<br>43.396391470749045                                                 | 997.7416474812381  | 1.9441581916696194E-9  |            |
|                                |                            | INS1;PIK3CA;PPARG;PIK3R2;FBP1;ACACA;IGF1R;PCK2                                               |                    |                        |            |
| 9. Glioma                      | 7/75<br>63.994025735294116 | 1.0935889828141608E-10<br>1467.7916758179063                                                 |                    | 1.9441581916696194E-9  | 0          |
|                                |                            | MAP2K1;PIK3CA;BRAF;PIK3R2;SOS1;RAF1;IGF1R                                                    |                    |                        |            |
| 10. Proteoglycans in cancer    | 9/203<br>0                 | 1.5584661687681132E-10<br>30.567525773195875                                                 | 690.2804159933993  | 2.493545870028981E-9   | 0          |
|                                |                            | MAP2K1;PIK3CA;FRS2;BRAF;PIK3R2;SOS1;RAF1;CBL;IGF1R                                           |                    |                        |            |

**Fig. 3A-b GO Biological process**

|    |                                                    |                                                                          |                       |                       |  |
|----|----------------------------------------------------|--------------------------------------------------------------------------|-----------------------|-----------------------|--|
| 1. | cellular response to insulin stimulus (GO:0032869) | 9/110                                                                    | 6.091506918849882E-13 | 6.091506918849882E-13 |  |
|    |                                                    | 3.9533879903335734E-10                                                   | 0                     | 58.99009900990099     |  |
|    |                                                    | 1659.1974499768214<br>PRKCI;PKLR;PPARG;PIK3R2;SORBS1;SOS1;GCK;IGF1R;PCK2 |                       |                       |  |

2. response to insulin (GO:0032868) 7/71 7.368534951486453E-11  
2.3910895917573538E-8 0 0 68.00732421875  
1586.693647227742 PRKCI;PKLR;PPARG;PIK3R2;SORBS1;GCK;PCK2
3. cellular response to peptide hormone stimulus (GO:0071375) 7/110  
1.6693108435580462E-9 3.6112757915639067E-7 0 0  
42.17415048543689 852.375638700225  
PRKCI;PKLR;PPARG;PIK3R2;SORBS1;GCK;PCK2
4. cellular glucose homeostasis (GO:0001678) 5/33 4.9264155952384554E-9  
7.993109303274394E-7 0 104.69012605042016  
2002.581216558548 PIK3R2;HK2;GCK;IGF1R;PCK2
5. transmembrane receptor protein tyrosine kinase signaling pathway (GO:0007169)  
9/396 5.352640065119736E-8 6.947726804525419E-6 0  
15.173643410852714 254.0536899204188  
PIK3CA;FRS2;PIK3R2;SORBS1;SOS1;CBL;FRS3;IGF1R;NCK1
6. insulin receptor signaling pathway (GO:0008286) 5/67 1.9104003837882453E-  
7 2.066416415130952E-5 0 47.19876660341556  
730.2018668253547 PIK3CA;PIK3R2;SORBS1;SOS1;IGF1R
7. pyruvate metabolic process (GO:0006090) 4/46 1.8986985018884242E-6  
1.760364753893696E-4 0 54.201360544217685  
714.067255553722 PKLR;GCK;HK2;PCK2
8. glycolytic process (GO:0006096) 3/23 1.1816441035959648E-5  
5.842794088959005E-4 0 83.0875 942.7123277486376  
PKLR;HK2;GCK
9. glucose homeostasis (GO:0042593) 4/74 1.287349249979027E-5  
5.842794088959005E-4 0 32.475102040816324  
365.6806971932668 PPARG;PIK3R2;GCK;HK2
10. axon guidance (GO:0007411) 5/158 1.3383789991443453E-5  
5.842794088959005E-4 0 19.038831218762013  
213.64360263511566 DOK2;PIK3CA;GRB10;FRS2;SOS1

**Supplementary Table 5 for Fig. 3B Upregulated pathways in 6-mo *Pcyt2*<sup>+/-</sup> liver**

**Wiki Pathway 2019 Mouse**

| Term                                                     | Overlap<br>Combined Score       | P-value                | Adjusted P-value<br>Genes                                                                                           | Old P-value        | Old Adjusted P-value    | Odds Ratio         |
|----------------------------------------------------------|---------------------------------|------------------------|---------------------------------------------------------------------------------------------------------------------|--------------------|-------------------------|--------------------|
| 1. Insulin Signaling WP65                                | 16/159<br>110.88671328671329    | 7.480853932910914E-25  | 6160.009786612667<br>PTPN1;PRKCI;JUN;SHC1;PDPK1;SLC2A1;PIK3R2;PIK3R1;FOS;AKT2;RPS6KA1;EIF4EBP1;AKT1;MAPK1;GRB2;RAF1 | 6160.009786612667  | 5.685448989012295E-23   | 0                  |
| 2. EGFR1 Signaling Pathway WP572                         | 14/178<br>0                     | 3.724366304165368E-20  | 3437.096004828217<br>CEBPB;PRKCI;JUN;SHC1;ARAF;PIK3R2;PIK3R1;FOS;RPS6KA1;AKT1;MAPK1;GRB2;KRAS;RAF1                  | 3437.096004828217  | 1.4152591955828397E-180 | 0                  |
| 3. Focal Adhesion-PI3K-Akt-mTOR-signaling pathway WP2841 | 15/324<br>8.633713839088465E-17 | 0                      | 0<br>SREBF1;PDPK1;SLC2A1;IRS2;PIK3R2;PIK3R1;VEGFA;AKT2;AKT3;EIF4EBP1;AKT1;MAPK1;GRB2;KRA                            | 45.43458159963014  | 4.11453478524301E-18    | 1818.8374386403746 |
| 4. Focal Adhesion WP85                                   | 13/185<br>65.03943377148634     | 4.544059915309719E-18  | 2597.200899846062<br>JUN;SHC1;PDPK1;ARAF;PIK3R2;PIK3R1;VEGFA;AKT2;AKT3;AKT1;MAPK1;GRB2;RAF1                         | 2597.200899846062  | 8.633713839088465E-17   | 0                  |
| 5. IL-6 signaling Pathway WP387                          | 11/99<br>0                      | 1.3368163335801963E-17 | 3861.2762999138718<br>CEBPB;JUN;SHC1;EIF4EBP1;AKT1;MAPK1;PIK3R2;GRB2;PIK3R1;FOS;RAF1                                | 3861.2762999138718 | 2.031960827041898E-16   | 0                  |
| 6. IL-5 Signaling Pathway WP151                          | 10/69<br>0                      | 2.860656750433226E-17  | 4942.888408930943<br>JUN;SHC1;RPS6KA1;AKT1;MAPK1;PIK3R2;GRB2;KRAS;PIK3R1;RAF1                                       | 4942.888408930943  | 3.623498550548752E-16   | 0                  |
| 7. Integrin-mediated Cell Adhesion WP6                   | 10/100<br>0                     | 1.4039043292691922E-15 | 2904.620706154356<br>SHC1;PDPK1;AKT2;AKT3;ARAF;AKT1;MAPK1;PIK3R2;GRB2;RAF1                                          | 2904.620706154356  | 1.5242389860636944E-14  | 0                  |
| 8. ESC Pluripotency Pathways WP339                       | 10/118<br>0                     | 7.737110119024626E-15  | 2297.6353532769176<br>JUN;AKT2;AKT3;ARAF;AKT1;MAPK1;PIK3R2;GRB2;FOS;RAF1                                            | 2297.6353532769176 | 7.350254613073394E-14   | 0                  |
| 9. IL-2 Signaling Pathway WP450                          | 9/76<br>0                       | 8.772632206983754E-15  | 3204.024749007802<br>SHC1;AKT1;MAPK1;IRS2;PIK3R2;GRB2;KRAS;PIK3R1;RAF1                                              | 3204.024749007802  | 7.408000530341836E-14   | 0                  |
| 10. Novel Jun-Dmp1 Pathway WP3654                        | 7/26<br>0                       | 2.1117806814715364E-14 | 7978.746344732662<br>JUN;RRAS;ARAF;MAPK1;KRAS;FOS;RAF1                                                              | 7978.746344732662  | 1.6049533179183675E-130 | 0                  |

**Jensen Diseases**

|                        |                             |                        |                                                                                   |                    |                         |   |
|------------------------|-----------------------------|------------------------|-----------------------------------------------------------------------------------|--------------------|-------------------------|---|
| 1. Hyperglycemia       | 11/108<br>90.11835051546392 | 3.621127000780859E-17  | 3411.6249295109155<br>PTPN1;SREBF1;JUN;G6PC;LEP;SLC2A1;AKT1;IRS2;PPARG;RETN;VEGFA | 3411.6249295109155 | 5.540324311194714E-15   | 0 |
| 2. Hyperinsulinism     | 7/54<br>102.28833455612619  | 5.48763317803716E-12   | 2652.1855444627995<br>SREBF1;G6PC;SLC2A1;AKT1;IRS2;PPARG;RETN                     | 2652.1855444627995 | 4.1980393811984273E-100 | 0 |
| 3. Fatty liver disease | 7/85<br>61.5393457117595    | 1.4704016405222077E-10 | 1393.2701928314445<br>SREBF1;ACOX1;LEP;AKT1;IRS2;PPARG;RETN                       | 1393.2701928314445 | 7.49904836666326E-9     | 0 |

|     |                   |       |                                              |                       |   |   |        |
|-----|-------------------|-------|----------------------------------------------|-----------------------|---|---|--------|
| 4.  | Arthritis         | 8/186 | 1.1652877018418393E-9                        | 4.4572254595450357E-8 | 0 | 0 |        |
|     |                   |       | 31.759229534510432                           | 653.2968102506449     |   |   |        |
|     |                   |       | JUN;LEP;AKT1;MAPK1;PPARG;RETN;FOS;VEGFA      |                       |   |   |        |
| 5.  | Cancer            | 9/300 | 2.2503138803435725E-9                        | 6.885960473851332E-8  | 0 | 0 |        |
|     |                   |       | 22.534936998854526                           | 448.72008525522403    |   |   |        |
|     |                   |       | PRKCI;JUN;AKT2;ARAF;AKT1;RRAS2;KRAS;FOS;RAF1 |                       |   |   |        |
| 6.  | Lipodystrophy     | 4/28  | 1.7546733069703368E-7                        | 4.474416932774359E-6  | 0 | 0 |        |
|     |                   |       | 103.85416666666667                           | 1615.5359919124223    |   |   |        |
|     |                   |       | SREBF1;LEP;PPARG;RETN                        |                       |   |   |        |
| 7.  | Neutropenia       | 4/72  | 8.334015310359583E-6                         | 1.778082598445152E-4  | 0 | 0 |        |
|     |                   |       | 36.5735294117647                             | 427.7334679739925     |   |   |        |
|     |                   |       | G6PC;ERCC1;KRAS;VEGFA                        |                       |   |   |        |
| 8.  | Diabetes mellitus | 4/74  | 9.297163913438704E-6                         | 1.778082598445152E-4  | 0 | 0 | 35.525 |
|     |                   |       | 411.5855862039443                            | AKT2;LEP;PPARG;RETN   |   |   |        |
| 9.  | Noonan syndrome   | 2/5   | 3.1392977135267624E-5                        | 5.336806112995496E-4  | 0 | 0 | 0      |
|     |                   |       | 391.3921568627451                            | 4058.3164477642435    |   |   |        |
|     |                   |       | KRAS;RAF1                                    |                       |   |   |        |
| 10. | Lung disease      | 4/119 | 6.057300576276312E-5                         | 9.148899989723336E-4  | 0 | 0 | 21.575 |
|     |                   |       | 209.52909068321378                           | JUN;AKT1;PPARG;VEGFA  |   |   |        |
